# Supplementary material
Source: bioRxiv or medRxiv preprint supplement (https://www.medrxiv.org/content/medrxiv/early/2021/06/14/2021.06.11.21258749/DC1/embed/media-1.pdf)
Supplement: Supplementary file [file media-1.pdf]

# The NICE COVID-19 search strategy for Ovid MEDLINE and Embase: developing and maintaining a strategy to support rapid guidelines

## Supplementary file A: Ovid MEDLINE search strategies

Paul Levay and Amy Finnegan, National Institute for Health and Care Excellence (NICE), United Kingdom

### Search strategies for Table 1 (search volume) and Table 3 (relevant references)

#### **Table 1 and Table 3. Full strategy**

Database: Ovid MEDLINE(R) ALL <1946 to December 02, 2020>

Search Strategy:

- 
- 1 (corona\* adj1 (virus\* or viral\*)).ti,ab,kw,kf. (2402)
  - 2 (corona\* adj1 virinae\*).ti,ab,kw,kf. (0)
  - 3 (corono\* adj1 (virus\* or viral\*)).ti,ab,kw,kf. (2)
  - 4 (corono\* adj1 virinae\*).ti,ab,kw,kf. (0)
  - 5 coronavirus\*.ti,ab,kw,kf. (43267)
  - 6 coronovirus\*.ti,ab,kw,kf. (37)
  - 7 coronavirinae\*.ti,ab,kw,kf. (23)
  - 8 coronovirinae\*.ti,ab,kw,kf. (0)
  - 9 CoV.ti,ab,kw,kf. (30044)
  - 10 ("2019-nCoV\*" or 2019nCoV\* or "19-nCoV\*" or 19nCoV\* or nCoV2019\* or "nCoV-2019\*" or nCoV19\* or "nCoV-19\*").ti,ab,kw,kf. (1411)
  - 11 ("COVID-19\*" or COVID19\* or "COVID-2019\*" or covid).ti,ab,kw,kf. (70497)
  - 12 ("HCoV-19\*" or HCoV19\* or "HCoV-2019\*" or HCoV2019\*).ti,ab,kw,kf. (21)
  - 13 ("2019 novel\*" or Ncov\* or "n-cov").ti,ab,kw,kf. (2377)
  - 14 ("SARS-CoV-2\*" or "SARSCoV-2\*" or "SARSCoV2\*" or "SARS-CoV2\*").ti,ab,kw,kf. (25185)
  - 15 (SARSCov19\* or "SARS-Cov19\*" or "SARSCov-19\*" or "SARS-Cov-19\*" or SARSCov2019\* or "SARS-Cov2019\*" or "SARSCov-2019\*" or "SARS-Cov-2019\*").ti,ab,kw,kf. (45)
  - 16 (SARS2\* or "SARS-2\*").ti,ab,kw,kf. (131)
  - 17 (SARScoronavirus2\* or "SARS-coronavirus-2\*").ti,ab,kw,kf. (177)
  - 18 ("SARScoronavirus 2\*" or "SARS coronavirus2\*").ti,ab,kw,kf. (0)
  - 19 (respiratory\* adj2 (symptom\* or disease\* or illness\* or condition\*) adj5 (Wuhan\* or Hubei\* or China\* or Chinese\* or Huanan\*)).ti,ab,kw,kf. (308)
  - 20 (("seafood market\*" or "food market\*") adj10 (Wuhan\* or Hubei\* or China\* or Chinese\* or Huanan\*)).ti,ab,kw,kf. (88)

- 21 (pneumonia\* adj3 (Wuhan\* or Hubei\* or China\* or Chinese\* or Huanan\*)).ti,ab,kw,kf. (546)
- 22 ((outbreak\* or wildlife\* or pandemic\* or epidemic\*) adj1 (Wuhan\* or Hubei\* or China\* or Chinese\* or Huanan\*)).ti,ab,kw,kf. (330)
- 23 "severe acute respiratory syndrome".ti,ab,kw,kf. (14161)
- 24 or/1-23 (94024)
- 25 (1 or 2 or 3 or 4 or 5 or 6 or 7 or 8 or 9 or 10 or 11 or 12 or 13 or 14 or 15 or 16 or 17 or 18 or 19 or 20 or 21 or 22 or 23) and ("2020\*" or "2021\*").yr. (79226)
- 26 (2 or 3 or 4 or 5 or 6 or 7 or 8 or 9 or 10 or 11 or 12 or 13 or 14 or 15 or 16 or 17 or 18 or 19 or 20 or 21 or 22 or 23) and ("2020\*" or "2021\*").yr. (79156)
- 27 25 not 26 (70)
- 28 (1 or 3 or 4 or 5 or 6 or 7 or 8 or 9 or 10 or 11 or 12 or 13 or 14 or 15 or 16 or 17 or 18 or 19 or 20 or 21 or 22 or 23) and ("2020\*" or "2021\*").yr. (79226)
- 29 25 not 28 (0)
- 30 (1 or 3 or 4 or 5 or 6 or 7 or 8 or 9 or 10 or 11 or 12 or 13 or 14 or 15 or 16 or 17 or 18 or 19 or 20 or 21 or 22 or 23) and ("2020\*" or "2021\*").yr. (79226)
- 31 25 not 30 (0)
- 32 (1 or 2 or 3 or 5 or 6 or 7 or 8 or 9 or 10 or 11 or 12 or 13 or 14 or 15 or 16 or 17 or 18 or 19 or 20 or 21 or 22 or 23) and ("2020\*" or "2021\*").yr. (79226)
- 33 25 not 32 (0)
- 34 (1 or 2 or 3 or 4 or 6 or 7 or 8 or 9 or 10 or 11 or 12 or 13 or 14 or 15 or 16 or 17 or 18 or 19 or 20 or 21 or 22 or 23) and ("2020\*" or "2021\*").yr. (76340)
- 35 25 not 34 (2886)
- 36 (1 or 2 or 3 or 4 or 5 or 7 or 8 or 9 or 10 or 11 or 12 or 13 or 14 or 15 or 16 or 17 or 18 or 19 or 20 or 21 or 22 or 23) and ("2020\*" or "2021\*").yr. (79224)
- 37 25 not 36 (2)
- 38 (1 or 2 or 3 or 4 or 5 or 6 or 8 or 9 or 10 or 11 or 12 or 13 or 14 or 15 or 16 or 17 or 18 or 19 or 20 or 21 or 22 or 23) and ("2020\*" or "2021\*").yr. (79226)
- 39 25 not 38 (0)
- 40 (1 or 2 or 3 or 4 or 5 or 6 or 7 or 9 or 10 or 11 or 12 or 13 or 14 or 15 or 16 or 17 or 18 or 19 or 20 or 21 or 22 or 23) and ("2020\*" or "2021\*").yr. (79226)
- 41 25 not 40 (0)
- 42 (1 or 2 or 3 or 4 or 5 or 6 or 7 or 8 or 10 or 11 or 12 or 13 or 14 or 15 or 16 or 17 or 18 or 19 or 20 or 21 or 22 or 23) and ("2020\*" or "2021\*").yr. (79035)
- 43 25 not 42 (191)
- 44 (1 or 2 or 3 or 4 or 5 or 6 or 7 or 8 or 9 or 11 or 12 or 13 or 14 or 15 or 16 or 17 or 18 or 19 or 20 or 21 or 22 or 23) and ("2020\*" or "2021\*").yr. (79226)
- 45 25 not 44 (0)

46 (1 or 2 or 3 or 4 or 5 or 6 or 7 or 8 or 9 or 10 or 12 or 13 or 14 or 15 or 16 or 17 or 18 or 19 or 20 or 21 or 22 or 23) and ("2020\*" or "2021\*").yr.  
(44312)

47 25 not 46 (34914)

48 (1 or 2 or 3 or 4 or 5 or 6 or 7 or 8 or 9 or 10 or 11 or 13 or 14 or 15 or 16 or 17 or 18 or 19 or 20 or 21 or 22 or 23) and ("2020\*" or "2021\*").yr.  
(79225)

49 25 not 48 (1)

50 (1 or 2 or 3 or 4 or 5 or 6 or 7 or 8 or 9 or 10 or 11 or 12 or 14 or 15 or 16 or 17 or 18 or 19 or 20 or 21 or 22 or 23) and ("2020\*" or "2021\*").yr.  
(79220)

51 25 not 50 (6)

52 (1 or 2 or 3 or 4 or 5 or 6 or 7 or 8 or 9 or 10 or 11 or 12 or 13 or 15 or 16 or 17 or 18 or 19 or 20 or 21 or 22 or 23) and ("2020\*" or "2021\*").yr.  
(79136)

53 25 not 52 (90)

54 (1 or 2 or 3 or 4 or 5 or 6 or 7 or 8 or 9 or 10 or 11 or 12 or 13 or 14 or 16 or 17 or 18 or 19 or 20 or 21 or 22 or 23) and ("2020\*" or "2021\*").yr.  
(79226)

55 25 not 54 (0)

56 (1 or 2 or 3 or 4 or 5 or 6 or 7 or 8 or 9 or 10 or 11 or 12 or 13 or 14 or 15 or 17 or 18 or 19 or 20 or 21 or 22 or 23) and ("2020\*" or "2021\*").yr.  
(79225)

57 25 not 56 (1)

58 (1 or 2 or 3 or 4 or 5 or 6 or 7 or 8 or 9 or 10 or 11 or 12 or 13 or 14 or 15 or 16 or 18 or 19 or 20 or 21 or 22 or 23) and ("2020\*" or "2021\*").yr.  
(79226)

59 25 not 58 (0)

60 (1 or 2 or 3 or 4 or 5 or 6 or 7 or 8 or 9 or 10 or 11 or 12 or 13 or 14 or 15 or 16 or 17 or 19 or 20 or 21 or 22 or 23) and ("2020\*" or "2021\*").yr.  
(79226)

61 25 not 60 (0)

62 (1 or 2 or 3 or 4 or 5 or 6 or 7 or 8 or 9 or 10 or 11 or 12 or 13 or 14 or 15 or 16 or 17 or 18 or 20 or 21 or 22 or 23) and ("2020\*" or "2021\*").yr.  
(79197)

63 25 not 62 (29)

64 (1 or 2 or 3 or 4 or 5 or 6 or 7 or 8 or 9 or 10 or 11 or 12 or 13 or 14 or 15 or 16 or 17 or 18 or 19 or 21 or 22 or 23) and ("2020\*" or "2021\*").yr.  
(79223)

65 25 not 64 (3)

66 (1 or 2 or 3 or 4 or 5 or 6 or 7 or 8 or 9 or 10 or 11 or 12 or 13 or 14 or 15 or 16 or 17 or 18 or 19 or 20 or 22 or 23) and ("2020\*" or "2021\*").yr.  
(79179)

67 25 not 66 (47)

68 (1 or 2 or 3 or 4 or 5 or 6 or 7 or 8 or 9 or 10 or 11 or 12 or 13 or 14 or 15 or 16 or 17 or 18 or 19 or 20 or 21 or 23) and ("2020\*" or "2021\*").yr.  
(79198)

69 25 not 68 (28)

70 (1 or 2 or 3 or 4 or 5 or 6 or 7 or 8 or 9 or 10 or 11 or 12 or 13 or 14 or 15 or 16 or 17 or 18 or 19 or 20 or 21 or 22) and ("2020\*" or "2021\*").yr.  
(79204)  
71 25 not 70 (22)  
72 exp coronavirus/ or exp Coronavirus Infections/ (54813)  
73 limit 72 to yr="2020 -Current" (40025)  
74 25 not 73 (40486)  
75 27 not 73 (65)  
76 29 not 73 (0)  
77 31 not 73 (0)  
78 33 not 73 (0)  
79 35 not 73 (1423)  
80 37 not 73 (2)  
81 39 not 73 (0)  
82 41 not 73 (0)  
83 43 not 73 (167)  
84 45 not 73 (0)  
85 47 not 73 (17629)  
86 49 not 73 (1)  
87 51 not 73 (6)  
88 53 not 73 (82)  
89 55 not 73 (0)  
90 57 not 73 (1)  
91 59 not 73 (0)  
92 61 not 73 (0)  
93 63 not 73 (29)  
94 65 not 73 (3)  
95 67 not 73 (46)  
96 69 not 73 (27)  
97 71 not 73 (20)

### **Table 1 and Table 3. Strategy with limits applied**

Database: Ovid MEDLINE(R) ALL <1946 to December 02, 2020>

Search Strategy:

- 
- 1 ((corona\* adj1 (virus\* or viral\*)).ti,ab,kw,kf. and english.lg.) not (letter or historical article or comment or editorial or news).pt. not (Animals/ not humans/) (1922)
  - 2 ((corona\* adj1 virinae\*).ti,ab,kw,kf. and english.lg.) not (letter or historical article or comment or editorial or news).pt. not (Animals/ not humans/) (0)
  - 3 ((corono\* adj1 (virus\* or viral\*)).ti,ab,kw,kf. and english.lg.) not (letter or historical article or comment or editorial or news).pt. not (Animals/ not humans/) (2)
  - 4 ((corono\* adj1 virinae\*).ti,ab,kw,kf. and english.lg.) not (letter or historical article or comment or editorial or news).pt. not (Animals/ not humans/) (0)
  - 5 (coronavirus\*.ti,ab,kw,kf. and english.lg.) not (letter or historical article or comment or editorial or news).pt. not (Animals/ not humans/) (34118)
  - 6 (coronavirus\*.ti,ab,kw,kf. and english.lg.) not (letter or historical article or comment or editorial or news).pt. not (Animals/ not humans/) (30)
  - 7 (coronavirinae\*.ti,ab,kw,kf. and english.lg.) not (letter or historical article or comment or editorial or news).pt. not (Animals/ not humans/) (15)
  - 8 (coronavirinae\*.ti,ab,kw,kf. and english.lg.) not (letter or historical article or comment or editorial or news).pt. not (Animals/ not humans/) (0)
  - 9 (CoV.ti,ab,kw,kf. and english.lg.) not (letter or historical article or comment or editorial or news).pt. not (Animals/ not humans/) (25113)
  - 10 (("2019-nCoV\*" or 2019nCoV\* or "19-nCoV\*" or 19nCoV\* or nCoV2019\* or "nCoV-2019\*" or nCoV19\* or "nCoV-19\*").ti,ab,kw,kf. and english.lg.) not (letter or historical article or comment or editorial or news).pt. not (Animals/ not humans/) (1091)
  - 11 (("COVID-19\*" or COVID19\* or "COVID-2019\*" or covid).ti,ab,kw,kf. and english.lg.) not (letter or historical article or comment or editorial or news).pt. not (Animals/ not humans/) (52037)
  - 12 (("HCoV-19\*" or HCoV19\* or "HCoV-2019\*" or HCoV2019\*).ti,ab,kw,kf. and english.lg.) not (letter or historical article or comment or editorial or news).pt. not (Animals/ not humans/) (19)
  - 13 (("2019 novel\*" or Ncov\* or "n-cov").ti,ab,kw,kf. and english.lg.) not (letter or historical article or comment or editorial or news).pt. not (Animals/ not humans/) (1888)
  - 14 (("SARS-CoV-2\*" or "SARSCoV-2\*" or "SARSCoV2\*" or "SARS-CoV2\*").ti,ab,kw,kf. and english.lg.) not (letter or historical article or comment or editorial or news).pt. not (Animals/ not humans/) (21230)
  - 15 ((SARSCov19\* or "SARS-Cov19\*" or "SARSCov-19\*" or "SARS-Cov-19\*" or SARSCov2019\* or "SARS-Cov2019\*" or "SARSCov-2019\*" or "SARS-Cov-2019\*").ti,ab,kw,kf. and english.lg.) not (letter or historical article or comment or editorial or news).pt. not (Animals/ not humans/) (41)
  - 16 ((SARS2\* or "SARS-2\*").ti,ab,kw,kf. and english.lg.) not (letter or historical article or comment or editorial or news).pt. not (Animals/ not humans/) (100)
  - 17 ((SARScoronavirus2\* or "SARS-coronavirus-2\*").ti,ab,kw,kf. and english.lg.) not (letter or historical article or comment or editorial or news).pt. not (Animals/ not humans/) (157)

- 18 ("SARScoronavirus 2\*" or "SARS coronavirus2\*").ti,ab,kw,kf. and english.lg.) not (letter or historical article or comment or editorial or news).pt. not (Animals/ not humans/) (0)
- 19 ((respiratory\* adj2 (symptom\* or disease\* or illness\* or condition\*) adj5 (Wuhan\* or Hubei\* or China\* or Chinese\* or Huanan\*)).ti,ab,kw,kf. and english.lg.) not (letter or historical article or comment or editorial or news).pt. not (Animals/ not humans/) (224)
- 20 (((("seafood market\*" or "food market\*") adj10 (Wuhan\* or Hubei\* or China\* or Chinese\* or Huanan\*)).ti,ab,kw,kf. and english.lg.) not (letter or historical article or comment or editorial or news).pt. not (Animals/ not humans/) (78)
- 21 ((pneumonia\* adj3 (Wuhan\* or Hubei\* or China\* or Chinese\* or Huanan\*)).ti,ab,kw,kf. and english.lg.) not (letter or historical article or comment or editorial or news).pt. not (Animals/ not humans/) (461)
- 22 (((outbreak\* or wildlife\* or pandemic\* or epidemic\*) adj1 (Wuhan\* or Hubei\* or China\* or Chinese\* or Huanan\*)).ti,ab,kw,kf. and english.lg.) not (letter or historical article or comment or editorial or news).pt. not (Animals/ not humans/) (250)
- 23 ("severe acute respiratory syndrome\*").ti,ab,kw,kf. and english.lg.) not (letter or historical article or comment or editorial or news).pt. not (Animals/ not humans/) (12454)
- 24 or/1-23 (66579)
- 25 (1 or 2 or 3 or 4 or 5 or 6 or 7 or 8 or 9 or 10 or 11 or 12 or 13 or 14 or 15 or 16 or 17 or 18 or 19 or 20 or 21 or 22 or 23) and ("2020\*" or "2021\*").yr. (57379)
- 26 (2 or 3 or 4 or 5 or 6 or 7 or 8 or 9 or 10 or 11 or 12 or 13 or 14 or 15 or 16 or 17 or 18 or 19 or 20 or 21 or 22 or 23) and ("2020\*" or "2021\*").yr. (57332)
- 27 25 not 26 (47)
- 28 (1 or 3 or 4 or 5 or 6 or 7 or 8 or 9 or 10 or 11 or 12 or 13 or 14 or 15 or 16 or 17 or 18 or 19 or 20 or 21 or 22 or 23) and ("2020\*" or "2021\*").yr. (57379)
- 29 25 not 28 (0)
- 30 (1 or 3 or 4 or 5 or 6 or 7 or 8 or 9 or 10 or 11 or 12 or 13 or 14 or 15 or 16 or 17 or 18 or 19 or 20 or 21 or 22 or 23) and ("2020\*" or "2021\*").yr. (57379)
- 31 25 not 30 (0)
- 32 (1 or 2 or 3 or 5 or 6 or 7 or 8 or 9 or 10 or 11 or 12 or 13 or 14 or 15 or 16 or 17 or 18 or 19 or 20 or 21 or 22 or 23) and ("2020\*" or "2021\*").yr. (57379)
- 33 25 not 32 (0)
- 34 (1 or 2 or 3 or 4 or 6 or 7 or 8 or 9 or 10 or 11 or 12 or 13 or 14 or 15 or 16 or 17 or 18 or 19 or 20 or 21 or 22 or 23) and ("2020\*" or "2021\*").yr. (55767)
- 35 25 not 34 (1612)
- 36 (1 or 2 or 3 or 4 or 5 or 7 or 8 or 9 or 10 or 11 or 12 or 13 or 14 or 15 or 16 or 17 or 18 or 19 or 20 or 21 or 22 or 23) and ("2020\*" or "2021\*").yr. (57378)
- 37 25 not 36 (1)

38 (1 or 2 or 3 or 4 or 5 or 6 or 8 or 9 or 10 or 11 or 12 or 13 or 14 or 15 or 16 or 17 or 18 or 19 or 20 or 21 or 22 or 23) and ("2020\*" or "2021\*").yr.  
(57379)

39 25 not 38 (0)

40 (1 or 2 or 3 or 4 or 5 or 6 or 7 or 9 or 10 or 11 or 12 or 13 or 14 or 15 or 16 or 17 or 18 or 19 or 20 or 21 or 22 or 23) and ("2020\*" or "2021\*").yr.  
(57379)

41 25 not 40 (0)

42 (1 or 2 or 3 or 4 or 5 or 6 or 7 or 8 or 10 or 11 or 12 or 13 or 14 or 15 or 16 or 17 or 18 or 19 or 20 or 21 or 22 or 23) and ("2020\*" or "2021\*").yr.  
(57199)

43 25 not 42 (180)

44 (1 or 2 or 3 or 4 or 5 or 6 or 7 or 8 or 9 or 11 or 12 or 13 or 14 or 15 or 16 or 17 or 18 or 19 or 20 or 21 or 22 or 23) and ("2020\*" or "2021\*").yr.  
(57379)

45 25 not 44 (0)

46 (1 or 2 or 3 or 4 or 5 or 6 or 7 or 8 or 9 or 10 or 12 or 13 or 14 or 15 or 16 or 17 or 18 or 19 or 20 or 21 or 22 or 23) and ("2020\*" or "2021\*").yr.  
(36761)

47 25 not 46 (20618)

48 (1 or 2 or 3 or 4 or 5 or 6 or 7 or 8 or 9 or 10 or 11 or 13 or 14 or 15 or 16 or 17 or 18 or 19 or 20 or 21 or 22 or 23) and ("2020\*" or "2021\*").yr.  
(57379)

49 25 not 48 (0)

50 (1 or 2 or 3 or 4 or 5 or 6 or 7 or 8 or 9 or 10 or 11 or 12 or 14 or 15 or 16 or 17 or 18 or 19 or 20 or 21 or 22 or 23) and ("2020\*" or "2021\*").yr.  
(57375)

51 25 not 50 (4)

52 (1 or 2 or 3 or 4 or 5 or 6 or 7 or 8 or 9 or 10 or 11 or 12 or 13 or 15 or 16 or 17 or 18 or 19 or 20 or 21 or 22 or 23) and ("2020\*" or "2021\*").yr.  
(57343)

53 25 not 52 (36)

54 (1 or 2 or 3 or 4 or 5 or 6 or 7 or 8 or 9 or 10 or 11 or 12 or 13 or 14 or 16 or 17 or 18 or 19 or 20 or 21 or 22 or 23) and ("2020\*" or "2021\*").yr.  
(57379)

55 25 not 54 (0)

56 (1 or 2 or 3 or 4 or 5 or 6 or 7 or 8 or 9 or 10 or 11 or 12 or 13 or 14 or 15 or 17 or 18 or 19 or 20 or 21 or 22 or 23) and ("2020\*" or "2021\*").yr.  
(57379)

57 25 not 56 (0)

58 (1 or 2 or 3 or 4 or 5 or 6 or 7 or 8 or 9 or 10 or 11 or 12 or 13 or 14 or 15 or 16 or 18 or 19 or 20 or 21 or 22 or 23) and ("2020\*" or "2021\*").yr.  
(57379)

59 25 not 58 (0)

60 (1 or 2 or 3 or 4 or 5 or 6 or 7 or 8 or 9 or 10 or 11 or 12 or 13 or 14 or 15 or 16 or 17 or 19 or 20 or 21 or 22 or 23) and ("2020\*" or "2021\*").yr.  
(57379)

61 25 not 60 (0)

62 (1 or 2 or 3 or 4 or 5 or 6 or 7 or 8 or 9 or 10 or 11 or 12 or 13 or 14 or 15 or 16 or 17 or 18 or 20 or 21 or 22 or 23) and ("2020\*" or "2021\*").yr.  
(57355)  
63 25 not 62 (24)  
64 (1 or 2 or 3 or 4 or 5 or 6 or 7 or 8 or 9 or 10 or 11 or 12 or 13 or 14 or 15 or 16 or 17 or 18 or 19 or 21 or 22 or 23) and ("2020\*" or "2021\*").yr.  
(57377)  
65 25 not 64 (2)  
66 (1 or 2 or 3 or 4 or 5 or 6 or 7 or 8 or 9 or 10 or 11 or 12 or 13 or 14 or 15 or 16 or 17 or 18 or 19 or 20 or 22 or 23) and ("2020\*" or "2021\*").yr.  
(57334)  
67 25 not 66 (45)  
68 (1 or 2 or 3 or 4 or 5 or 6 or 7 or 8 or 9 or 10 or 11 or 12 or 13 or 14 or 15 or 16 or 17 or 18 or 19 or 20 or 21 or 23) and ("2020\*" or "2021\*").yr.  
(57353)  
69 25 not 68 (26)  
70 (1 or 2 or 3 or 4 or 5 or 6 or 7 or 8 or 9 or 10 or 11 or 12 or 13 or 14 or 15 or 16 or 17 or 18 or 19 or 20 or 21 or 22) and ("2020\*" or "2021\*").yr.  
(57361)  
71 25 not 70 (18)  
72 exp coronavirus/ or exp Coronavirus Infections/ (54813)  
73 limit 72 to yr="2020 -Current" (40025)  
74 25 not 73 (32993)  
75 27 not 73 (47)  
76 29 not 73 (0)  
77 31 not 73 (0)  
78 33 not 73 (0)  
79 35 not 73 (1059)  
80 37 not 73 (1)  
81 39 not 73 (0)  
82 41 not 73 (0)  
83 43 not 73 (163)  
84 45 not 73 (0)  
85 47 not 73 (12540)  
86 49 not 73 (0)  
87 51 not 73 (4)  
88 53 not 73 (35)  
89 55 not 73 (0)  
90 57 not 73 (0)  
91 59 not 73 (0)  
92 61 not 73 (0)  
93 63 not 73 (24)  
94 65 not 73 (2)  
95 67 not 73 (44)  
96 69 not 73 (26)  
97 71 not 73 (17)



## Search strategy options from Figure 1 and Figure 2

**Figure 1. Categorising the 23 lines of COVID-19 free text**

| Priority | Definition                                                                                                                                                                                            |
|----------|-------------------------------------------------------------------------------------------------------------------------------------------------------------------------------------------------------|
| Critical | Removing this line would mean >10 relevant references would have been missed                                                                                                                          |
| High     | Removing this line would mean <10 relevant references would have been missed                                                                                                                          |
| Medium   | Removing this line would not affect the number of relevant references but it has >1400 results so that suggests the terms are being used in the literature and could be useful in a sensitive search. |
| Low      | Removing this line would not affect the number of relevant references but it has <750 results so that suggests the terms not often used.                                                              |
| Zero     | These lines have zero and so have never been used in the literature.                                                                                                                                  |

**Figure 2. The five test strategies for COVID-19 derived from the categories in Figure 1**

| Search | Free-text lines to retain   | Free-text lines to remove |
|--------|-----------------------------|---------------------------|
| A      | All lines                   | None                      |
| B      | Critical, High, Medium, Low | Zero                      |
| C      | Critical, High, Medium      | Zero, Low                 |
| D      | Critical, High              | Zero, Low, Medium         |
| E      | Critical                    | Zero, Low, Medium, High   |

**Strategy A. Original NICE search strategy v9 (June 2020)**

| Category from Figure 1 | Line number | Search terms                                                                                                                                            |
|------------------------|-------------|---------------------------------------------------------------------------------------------------------------------------------------------------------|
| x                      | 1           | exp coronavirus/                                                                                                                                        |
| x                      | 2           | exp Coronavirus Infections/                                                                                                                             |
| High                   | 3           | (corona* adj1 (virus* or viral*)).ti,ab,kw,kf.                                                                                                          |
| Zero                   | 4           | (corona* adj1 virinae*).ti,ab,kw,kf.                                                                                                                    |
| Low                    | 5           | (corono* adj1 (virus* or viral*)).ti,ab,kw,kf.                                                                                                          |
| Zero                   | 6           | (corono* adj1 virinae*).ti,ab,kw,kf.                                                                                                                    |
| Critical               | 7           | coronavirus*.ti,ab,kw,kf.                                                                                                                               |
| Low                    | 8           | coronavirus*.ti,ab,kw,kf.                                                                                                                               |
| Low                    | 9           | coronavirinae*.ti,ab,kw,kf.                                                                                                                             |
| Zero                   | 10          | coronavirinae*.ti,ab,kw,kf.                                                                                                                             |
| Medium                 | 11          | CoV.ti,ab,kw,kf.                                                                                                                                        |
| Medium                 | 12          | ("2019-nCoV*" or 2019nCoV* or "19-nCoV*" or 19nCoV* or nCoV2019* or "nCoV-2019*" or nCoV19* or "nCoV-19*").ti,ab,kw,kf.                                 |
| Critical               | 13          | ("COVID-19*" or COVID19* or "COVID-2019*" or covid).ti,ab,kw,kf.                                                                                        |
| Low                    | 14          | ("HCoV-19*" or HCoV19* or "HCoV-2019*" or HCoV2019*).ti,ab,kw,kf.                                                                                       |
| Medium                 | 15          | ("2019 novel*" or Ncov* or "n-cov").ti,ab,kw,kf.                                                                                                        |
| High                   | 16          | ("SARS-CoV-2*" or "SARSCoV-2*" or "SARSCoV2*" or "SARS-CoV2*").ti,ab,kw,kf.                                                                             |
| Low                    | 17          | (SARSCov19* or "SARS-Cov19*" or "SARSCov-19*" or "SARS-Cov-19*" or SARSCov2019* or "SARS-Cov2019*" or "SARSCov-2019*" or "SARS-Cov-2019*").ti,ab,kw,kf. |
| Low                    | 18          | (SARS2* or "SARS-2*").ti,ab,kw,kf.                                                                                                                      |
| Low                    | 19          | (SARScoronavirus2* or "SARS-coronavirus-2*").ti,ab,kw,kf.                                                                                               |
| Zero                   | 20          | ("SARScoronavirus 2*" or "SARS coronavirus2*").ti,ab,kw,kf.                                                                                             |
| Low                    | 21          | (respiratory* adj2 (symptom* or disease* or illness* or condition*) adj5 (Wuhan* or Hubei* or China* or Chinese* or Huanan*)).ti,ab,kw,kf.              |
| Low                    | 22          | ((("seafood market*" or "food market*") adj10 (Wuhan* or Hubei* or China* or Chinese* or Huanan*)).ti,ab,kw,kf.                                         |
| Low                    | 23          | (pneumonia* adj3 (Wuhan* or Hubei* or China* or Chinese* or Huanan*)).ti,ab,kw,kf.                                                                      |
| Low                    | 24          | ((outbreak* or wildlife* or pandemic* or epidemic*) adj1 (Wuhan* or Hubei* or China* or Chinese* or Huanan*)).ti,ab,kw,kf.                              |
| Medium                 | 25          | "severe acute respiratory syndrome*".ti,ab,kw,kf.                                                                                                       |
| x                      | 26          | or/1-25                                                                                                                                                 |

### Strategy B. Retain Low lines, Remove Zero lines

| Categorisation from Figure 1 | Line number | Search terms                                                                                                                                            |
|------------------------------|-------------|---------------------------------------------------------------------------------------------------------------------------------------------------------|
| x                            | 1           | exp coronavirus/                                                                                                                                        |
| x                            | 2           | exp Coronavirus Infections/                                                                                                                             |
| High                         | 3           | (corona* adj1 (virus* or viral*)).ti,ab,kw,kf.                                                                                                          |
| Low                          | 4           | (corono* adj1 (virus* or viral*)).ti,ab,kw,kf.                                                                                                          |
| Critical                     | 5           | coronavirus*.ti,ab,kw,kf.                                                                                                                               |
| Low                          | 6           | coronavirus*.ti,ab,kw,kf.                                                                                                                               |
| Low                          | 7           | coronavirinae*.ti,ab,kw,kf.                                                                                                                             |
| Medium                       | 8           | CoV.ti,ab,kw,kf.                                                                                                                                        |
| Medium                       | 9           | ("2019-nCoV*" or 2019nCoV* or "19-nCoV*" or 19nCoV* or nCoV2019* or "nCoV-2019*" or nCoV19* or "nCoV-19*").ti,ab,kw,kf.                                 |
| Critical                     | 10          | ("COVID-19*" or COVID19* or "COVID-2019*" or covid).ti,ab,kw,kf.                                                                                        |
| Low                          | 11          | ("HCoV-19*" or HCoV19* or "HCoV-2019*" or HCoV2019*).ti,ab,kw,kf.                                                                                       |
| Medium                       | 12          | ("2019 novel*" or Ncov* or "n-cov").ti,ab,kw,kf.                                                                                                        |
| High                         | 13          | ("SARS-CoV-2*" or "SARSCoV-2*" or "SARSCoV2*" or "SARS-CoV2*").ti,ab,kw,kf.                                                                             |
| Low                          | 14          | (SARSCov19* or "SARS-Cov19*" or "SARSCov-19*" or "SARS-Cov-19*" or SARSCov2019* or "SARS-Cov2019*" or "SARSCov-2019*" or "SARS-Cov-2019*").ti,ab,kw,kf. |
| Low                          | 15          | (SARS2* or "SARS-2*").ti,ab,kw,kf.                                                                                                                      |
| Low                          | 16          | (SARScoronavirus2* or "SARS-coronavirus-2*").ti,ab,kw,kf.                                                                                               |
| Low                          | 17          | (respiratory* adj2 (symptom* or disease* or illness* or condition*) adj5 (Wuhan* or Hubei* or China* or Chinese* or Huanan*)).ti,ab,kw,kf.              |
| Low                          | 18          | ((("seafood market*" or "food market*") adj10 (Wuhan* or Hubei* or China* or Chinese* or Huanan*)).ti,ab,kw,kf.                                         |
| Low                          | 19          | (pneumonia* adj3 (Wuhan* or Hubei* or China* or Chinese* or Huanan*)).ti,ab,kw,kf.                                                                      |
| Low                          | 20          | ((outbreak* or wildlife* or pandemic* or epidemic*) adj1 (Wuhan* or Hubei* or China* or Chinese* or Huanan*)).ti,ab,kw,kf.                              |
| Medium                       | 21          | "severe acute respiratory syndrome*".ti,ab,kw,kf.                                                                                                       |
| x                            | 22          | or/1-21                                                                                                                                                 |

### **Strategy C. Retain Medium lines, Remove Zero and Low lines**

| <b>Categorisation from Figure 1</b> | <b>Line number</b> | <b>Search terms</b>                                                                                                     |
|-------------------------------------|--------------------|-------------------------------------------------------------------------------------------------------------------------|
| x                                   | 1                  | exp coronavirus/                                                                                                        |
| x                                   | 2                  | exp Coronavirus Infections/                                                                                             |
| High                                | 3                  | (corona* adj1 (virus* or viral*)).ti,ab,kw,kf.                                                                          |
| Critical                            | 4                  | coronavirus*.ti,ab,kw,kf.                                                                                               |
| Medium                              | 5                  | CoV.ti,ab,kw,kf.                                                                                                        |
| Medium                              | 6                  | ("2019-nCoV*" or 2019nCoV* or "19-nCoV*" or 19nCoV* or nCoV2019* or "nCoV-2019*" or nCoV19* or "nCoV-19*").ti,ab,kw,kf. |
| Critical                            | 7                  | ("COVID-19*" or COVID19* or "COVID-2019*" or covid).ti,ab,kw,kf.                                                        |
| Medium                              | 8                  | ("2019 novel*" or Ncov* or "n-cov").ti,ab,kw,kf.                                                                        |
| High                                | 9                  | ("SARS-CoV-2*" or "SARSCoV-2*" or "SARSCoV2*" or "SARS-CoV2*").ti,ab,kw,kf.                                             |
| Medium                              | 10                 | "severe acute respiratory syndrome*".ti,ab,kw,kf.                                                                       |
| x                                   | 11                 | or/1-10                                                                                                                 |

### **Strategy D. Retain High lines, Remove Medium lines**

| <b>Categorisation from Figure 1</b> | <b>Line number</b> | <b>Search terms</b>                                                         |
|-------------------------------------|--------------------|-----------------------------------------------------------------------------|
| x                                   | 1                  | exp coronavirus/                                                            |
| x                                   | 2                  | exp Coronavirus Infections/                                                 |
| High                                | 3                  | (corona* adj1 (virus* or viral*)).ti,ab,kw,kf.                              |
| Critical                            | 4                  | coronavirus*.ti,ab,kw,kf.                                                   |
| Critical                            | 5                  | ("COVID-19*" or COVID19* or "COVID-2019*" or covid).ti,ab,kw,kf.            |
| High                                | 6                  | ("SARS-CoV-2*" or "SARSCoV-2*" or "SARSCoV2*" or "SARS-CoV2*").ti,ab,kw,kf. |
| x                                   | 7                  | or/1-6                                                                      |

### **Strategy E. Retain Critical lines, Remove all other lines**

| <b>Categorisation from Figure 1</b> | <b>Line number</b> | <b>Search terms</b>                                              |
|-------------------------------------|--------------------|------------------------------------------------------------------|
| x                                   | 1                  | exp coronavirus/                                                 |
| x                                   | 2                  | exp Coronavirus Infections/                                      |
| Critical                            | 3                  | coronavirus*.ti,ab,kw,kf.                                        |
| Critical                            | 4                  | ("COVID-19*" or COVID19* or "COVID-2019*" or covid).ti,ab,kw,kf. |
| x                                   | 5                  | or/1-4                                                           |

## Search strategies for Table 5 (searching for drug treatments)

### **Table 5. Strategy A NOT Strategy B (with drugs and clinical trials)**

Database: Ovid MEDLINE(R) ALL <1946 to February 15, 2021>

Search Strategy:

- 
- 1 exp coronavirus/ (45624)
  - 2 exp Coronavirus Infections/ (49830)
  - 3 (corona\* adj1 (virus\* or viral\*)).ti,ab,kw,kf. (2935)
  - 4 (corona\* adj1 virinae\*).ti,ab,kw,kf. (0)
  - 5 (corono\* adj1 (virus\* or viral\*)).ti,ab,kw,kf. (2)
  - 6 (corono\* adj1 virinae\*).ti,ab,kw,kf. (0)
  - 7 coronavirus\*.ti,ab,kw,kf. (53545)
  - 8 coronovirus\*.ti,ab,kw,kf. (43)
  - 9 coronavirinae\*.ti,ab,kw,kf. (23)
  - 10 coronovirinae\*.ti,ab,kw,kf. (0)
  - 11 CoV.ti,ab,kw,kf. (39127)
  - 12 ("2019-nCoV\*" or 2019nCoV\* or "19-nCoV\*" or 19nCoV\* or nCoV2019\* or "nCoV-2019\*" or nCoV19\* or "nCoV-19\*").ti,ab,kw,kf. (1622)
  - 13 ("COVID-19\*" or COVID19\* or "COVID-2019\*" or covid).ti,ab,kw,kf. (94025)
  - 14 ("HCoV-19\*" or HCoV19\* or "HCoV-2019\*" or HCoV2019\*).ti,ab,kw,kf. (25)
  - 15 ("2019 novel\*" or Ncov\* or "n-cov").ti,ab,kw,kf. (2722)
  - 16 ("SARS-CoV-2\*" or "SARSCoV-2\*" or "SARSCoV2\*" or "SARS-CoV2\*").ti,ab,kw,kf. (34299)
  - 17 (SARSCov19\* or "SARS-Cov19\*" or "SARSCov-19\*" or "SARS-Cov-19\*" or SARSCov2019\* or "SARS-Cov2019\*" or "SARSCov-2019\*" or "SARS-Cov-2019\*").ti,ab,kw,kf. (58)
  - 18 (SARS2\* or "SARS-2\*").ti,ab,kw,kf. (164)
  - 19 (SARScoronavirus2\* or "SARS-coronavirus-2\*").ti,ab,kw,kf. (223)
  - 20 ("SARScoronavirus 2\*" or "SARS coronavirus2\*").ti,ab,kw,kf. (0)
  - 21 (respiratory\* adj2 (symptom\* or disease\* or illness\* or condition\*) adj5 (Wuhan\* or Hubei\* or China\* or Chinese\* or Huanan\*)).ti,ab,kw,kf. (324)
  - 22 (("seafood market\*" or "food market\*") adj10 (Wuhan\* or Hubei\* or China\* or Chinese\* or Huanan\*)).ti,ab,kw,kf. (99)
  - 23 (pneumonia\* adj3 (Wuhan\* or Hubei\* or China\* or Chinese\* or Huanan\*)).ti,ab,kw,kf. (578)
  - 24 ((outbreak\* or wildlife\* or pandemic\* or epidemic\*) adj1 (Wuhan\* or Hubei\* or China\* or Chinese\* or Huanan\*)).ti,ab,kw,kf. (366)
  - 25 "severe acute respiratory syndrome\*".ti,ab,kw,kf. (17413)
  - 26 or/1-25 (126978)
  - 27 ((26 and english.lg.) not (letter or historical article or comment or editorial or news).pt. not (Animals/ not humans/)) and ("2020\*" or "2021\*").yr. (78535)
  - 28 Interleukin 1 Receptor Antagonist Protein/ (5275)
  - 29 (anakinra\* or kineret\* or IL-1ra or IL1ra or Il-a).tw,kw. (8135)

- 30 ((interleukin-1 or interleukin1) adj3 (blocker\* or blocking\* or antagonis\* or inhibit\* or agonist\* or agent\*)).tw,kw. (4559)
- 31 exp Dexamethasone/ (52062)
- 32 (dexamethasone\* or adrecort\* or adrenocot\* or aereoseb-dex\* or aflucoson\* or alfalyl\* or anaflogistico\* or arcodexan\* or artrosone\* or azium\* or bidexol\* or calonat\* or cebedex\* or cetadexon\* or cilodex\* or colofeam\* or corsona\* or cortastat\* or cortidex\* or cortidron\* or cortisumman\* or dacortina fuerte\* or dalalone\* or danasone\* or decacortin\* or decadelton\* or decaderm\* or decadion\* or decadrans\* or decadron\* or decaesadril\* or decaject\* or decameth\* or decasone\* or decaspray\* or decasterolone\* or decdan\* or decilone\* or decofluor\* or dectancyl\* or dekacort\* or delladec\* or deltafluoren\* or dergramin\* or deronil\* or desacort\* or desadrene\* or desalark\* or desameton\* or desigdrone\* or dexa cortisyl\* or dexa dabrosan\* or dexa korti\* or dexa scherosan\* or dexa scherozon\* or dexacen\* or dexachel\* or dexacort\* or dexadabrosan\* or dexadecadrol\* or dexadrol\* or dexagel\* or dexagen\* or dexahelvacort\* or dexakorti\* or dexalien\* or dexalocal\* or dexame\* or dexameth\* or dexamonozon\* or dexan\* or dexapot\* or dexascheron\* or dexascherozon\* or dexason\* or dexinoral\* or dexionil\* or dexmethsone\* or dexona\* or dexone\* or dexpak\* or dexsol\* or dextelan\* or dextrason\* or dexycu\* or dezone\* or dibasona\* or diodex\* or dropodex\* or esacortene\* or exadion\* or eythalm\* or firmalone\* or fluormethyl prednisolone\* or fluormethylprednisolon\* or fluormone\* or fluorocort\* or fluorodelta\* or fluoromethylprednisolone\* or fortocortin or gammacorten\* or glensoludex\* or grosodexon\* or hexadecadiol\* or hexadecadrol\* or hexadiol\* or hexadrol\* or isnacort\* or isopto dex\* or isopto maxidex\* or isoptodex\* or isoptomaxidex\* or lokalison\* or loverine\* or luxazone\* or martapan\* or marvidione\* or maxidex\* or maxitrol\* or mediamethasone\* or megacortin\* or mephameson\* or metasolon\* or methazon ion\* or methazone ion\* or methazonion\* or methylfluorprednisolone\* or metisone lafi\* or mexasone\* or millicorten\* or millicortenol\* or mk 125 or mk125 or mymethasone\* or neoforderx\* or neofordex\* or nisomethasone\* or novocort\* or nsc 34521 or nsc34521 or oftan-dexa\* or opticorten\* or opticortinol\* or oradexan\* or oradexon\* or orgadrone\* or otomize\* or ozurdex\* or pidexon\* or policort\* or posurdex\* or predni f tablinen\* or predni-f or prednisolone f or prodexon\* or sanamethasone\* or santenson\* or santeson\* or sawasone\* or sofradex\* or solurex\* or spoloven\* or sterasone\* or thilodexine\* or tobradex\* or triamcimetil\* or vexamet\* or visumetazone\* or visumethazone\*).tw,kw. (61118)
- 33 Hydrocortisone/ (72699)
- 34 Hydrocortisone\*.tw,kw. (18867)
- 35 exp Hydroxychloroquine/ (4310)
- 36 (Hydroxychloroquin\* or hydroxychlorochin\* or quinoric\* or plaquenil\* or zentiva\*).tw,kw. (6531)
- 37 exp Plasma/ (27483)
- 38 (plasma\* adj3 (convalesc\* or therap\* or treatment\* or infusion\*)).tw,kw. (29597)
- 39 (Remdesivir\* or "GS-5734" or GS5734).tw,kw. (1118)
- 40 (Sarilumab\* or Kevzara\*).tw,kw. (162)
- 41 (Tocilizumab\* or RoActemra\* or Actemra\* or Atlizumab\*).tw,kw. (3977)
- 42 exp Vitamin D/ (60591)

43 exp Vitamin D Deficiency/ (28599)

44 ((vitamin\* adj5 D\*2) or vitaminD\*2).tw,kw. (82484)

45 (ergocalciferol\* or calciferol\* or vs041h42xc or dihydrotachysterol\* or dihydrotachysterin\* or calcamine\* or "67-96-9" or r5lm3h112r or Hydroxyvitamin D\*2 or 25Hydroxyvitamin D\*2 or HydroxyvitaminD\*2 or 25HydroxyvitaminD\*2 or hydroxycalciferol\* or 25hydroxycalciferol\* or hydroxyergocalciferol\* or 25hydroxyergocalciferol\* or ercalcidiol\* or "25(OH)D" or "21343-40-8" or alfacalcidol\* or cholecalciferol\* or colecalciferol\* or calciol\* or "67-97-0" or 1c6v77qf41 or hydroxycholecalciferol\* or hydroxycolecalciferol\* or 25hydroxycholecalciferol\* or 25hydroxycolecalciferol\* or calcifediol\* or calcidiol\* or "19356-17-3" or p6yz13c99q or t0wxw8f54e or dihydroxycholecalciferol\* or dihydroxycolecalciferol\* or 25dihydroxycholecalciferol\* or 25dihydroxycolecalciferol\* or dihydroxyvitamin D\*2 or 25dihydroxyvitamin\* or dihydroxyvitaminD\*2 or calcitriol\* or "32222-06-3" or "40013-87-4" or "55721-11-4").tw,kw. (37055)

46 Ibuprofen/ (9050)

47 (ibuprofen\* or "15687-27-1" or Advil\* or Anadin\* or Ibucalm\* or Ibular\* or Nurofen\* or Brufen\* or Cuprofen\* or Numark\* or Flarin\* or Galpharm\*).tw,kw. (15272)

48 exp Naproxen/ (4169)

49 (naproxen\* or aleve\* or Naprosyn\* or stirlescent\* or Naprosyn\* or anaprox\* or naprox\* or naprelan\*).tw,kw. (6441)

50 exp Indomethacin/ (30337)

51 (Indometacin\* or indomethacin\* or indocid\* or indocin\*).tw,kw. (37047)

52 Celecoxib/ (4455)

53 (Celecoxib\* or celebrex\* or Onsenal\* or Elyxyb\*).tw,kw. (6584)

54 (Nimesulide\* or Nimefen\*).tw,kw. (1614)

55 (Bamlanivimab\* or LY3819253 or "LY-CoV555" or LYCoV555).tw,kw. (20)

56 (casirivimab\* or imdevimab\* or REGN10933 or REGN10987 or "REGN 10933" or "REGN 10987").tw,kw. (8)

57 ((Regeneron\* or REGN) adj4 ("10933" or "10987" or cov2)).tw,kw. (10)

58 Aspirin/ (45592)

59 ((acetylsalicylic\* or acetoxibenzoic\* or "acetyloxy benzoic\*") adj acid\*).tw,kw. (9155)

60 (asa adj (akut\* or cardio\* or direk\* or effect\* or express\* or migraine\* or migrane\* or migren\* or pro or protect\* or ultra\* or zipp\*)).tw,kw. (97)

61 (aspirin\* or DB00945 or BAY1019036 or "NSC-27223" or "NSC-406186" or "50-78-2" or r16co5y76e or acenterine\* or acesal\* or acetosal\* or acetylin\* or acetylo\* or acetysal\* or acylpyrin\* or aloxiprimum adiro\* or alabukun\* or "albyl e" or "albyl-e" or "albyl minor\*" or "alka seltzer\*" or alkaspirin\* or andol\* or anopyrin\* or arthralgyl\* or asaa or asacard\* or asae or asaetta\* or asaflow\* or asaphen\* or aspiricor\* or aspisol\* or "aspo cid" or aspro or asproflash\* or asrivo\* or asta or astrix\* or bamyl\* or bebesan\* or bufferin\* or cafenol\* or caprin\* or cardioasa\* or cardioflow\* or cartia\* or catalgine\* or catalgix\* or claragine\* or colfarit\* or contrheuma\* or darosal\* or dispirin\* or dispril\* or dolean\* or durlaza\* or easprin\* or ecotrin\* or endosprin\* or ecosprin\* or egalgic\* or empirin\* or enterosarine\* or entrophen\* or flamasacard\* or godamed\* or "herz ass" or hjertemagnyl\* or istopirin\* or juvepirine\* or

kinderaspirin\* or magnecyl\* or magnyl\* or mejoral\* or melabon\* or micristin\* or micropyrin\* or migrasaa\* or mikrstin\* or miniasal\* or "nu seal\*" or ostoprin\* or pancemol\* or paracin\* or polopirin\* or polopiryna\* or primaspan\* or pyronoval\* or phonal\* or salospir\* or solprin\* or solupsan\* or sargepirine\* or sedergine\* or solucetyl\* or solupsa\* or "super tru" or tapal\* or "toldex retard\*" or treupahlin\* or treuphalin\* or tromalyt\* or turivital\* or vazalore\* or vitalink\* or zorprin\*).tw,kw. (72246)

62 (NCT02735707 or 2015-002340-14 or NCT04330638 or NCT04364009 or NCT04362111 or "2020-001500-41" or NCT04324021 or "2020-001167-93" or NCT04357366 or "2020-001466-11" or NCT04339712 or NCT04341584 or "2020-001039-29").af. (5)

63 ("2020-001113-21" or ISRCTN50189673 or NCT04347980 or NCT04327401 or NCT04346355 or "2020-001333-13" or NCT04344730 or "2020-001457-43" or NCT04325061 or "2020-001278-31").af. (4)

64 (NCT02735707 or "2015-002340-14" or NCT04381936 or "2020-001113-21" or ISRCTN50189673 or "ISRCTN 50189673" or NCT04348305 or "2020-001395-15" or NCT04359511).af. (7)

65 (NCT04325893 or HYCOVID or "49RC20-0071" or NCT04328467 or STUDY00009414 or NCT04329611 or "ABCOV-01" or NCT04331834 or "PrEP\_COVID" or NCT04334382 or HyAzOUT or "1051360" or NCT04334928 or EPICOS or "PrEP COVID-19" or NCT04341441 or "WHIP COVID-19" or "1410401" or NCT04344379 or "PREP-COVID" or APHP200386 or NCT04345861 or COVIDOC or "RECHMPL20-168" or NCT04347980 or DHYSCO or "2037815010" or NCT04321616 or "118684" or NCT04328961 or STUDY00009750 or NCT04341870 or "CORIMUNO-VIRO" or "APHP200375-3" or NCT04351724 or ACOVACT or NCT04353271 or "1582736-1" or "2020-001765-37" or NCT04307693 or "S2020-0472-0001" or NCT04329832 or HAHPS or "1051355" or NCT04332094 or TOCOVID or "IIBSP-COV-2020-23" or NCT04333225 or "020-132" or NCT04342221 or "COV-HCQ" or NCT04346147 or "Covid-19HUF" or "24032020" or NCT04347031 or NCT04344457 or "HIZ-PRC-COVID-19" or NCT04333654 or EFC16855 or "2020-001269-35" or "U1111-1249-6168" or NCT04351620 or "IRB20-0572").af. (45)

66 (NCT04373460 or IRB00247590 or NCT04372979 or "2020-A01166-33" or NCT04372368 or NCT04366245 or NCT04365439 or NCT04364737 or NCT04363034 or NCT04362176 or NCT04361253 or NCT04360486 or ASCoV2CP or NCT04359810 or AAAS9924 or NCT04358783 or "IF20-00002" or NCT04358211 or NCT04357106 or "CHMI-030420-01" or NCT04356534 or NCT04356482 or TERAPLASCOV2 or NCT04355897 or NCT04355767 or NCT04354831 or PRO00037712 or NCT04353206 or NCT04352751 or NCT04348877 or NCT04348656 or "CONCOR-1" or NCT04347681 or HAEM0321 or NCT04346589 or NCT04346446 or "ILBS-COVID-02" or NCT04345679 or AntiCOVID19ORT or NCT04345523 or "ConPlas-19" or NCT04345289 or "2020-001367-88" or NCT04344535 or "SBU-COVID19\*" or NCT04344015 or NCT04343755 or "Pro2020-0375" or NCT04343261 or "SFH-20-23" or NCT04342182 or "ConCoVid-19" or NCT04340050 or "IRB20-0523" or NCT04338360 or "20-003312" or NCT04333355 or NCT04333251 or NCT04332835 or "ABN011-2" or NCT04332380 or "ABN011-1" or NCT04327349 or IRCT20181104041551N1 or NCT04325672 or "20-002864" or NCT04323800 or IRB00245634 or



NCT04321421 or IRCCSSanMatteoH or "COV19-PLASMA" or NCT04264858 or ChiCTR2000030841 or "WuhanUH-2019 nCoV-Ig" or NCT04292340 or ChiCTR2000030929 or ChiCTR2000030702 or ChiCTR2000030627 or ChiCTR2000030179 or ChiCTR2000030046 or ChiCTR2000030039 or ChiCTR2000030010 or ChiCTR2000029850 or ChiCTR2000029757 or "2020-001632-10" or "2020-001310-38" or "CAPSID2020-DRK-BSD" or NCT04374370 or NCT04374487 or "MHC-COVID-19-CP" or NCT04374526 or NCT04374565 or NCT04375098 or NCT04376788 or NCT04377672 or IRB00247557 or NCT04377568 or NCT04376034).af. (17)

67 ("2020-001052-18" or "2020-001366-11" or NCT04252664 or NCT04257656 or NCT04292730 or NCT04292899 or NCT04302766 or NCT04315948 or NCT04321616 or NCT04323761).af. (9)

68 (NCT02735707 or NCT04327388 or NCT04345289 or NCT04324073 or NCT04341870 or NCT04322773 or NCT04357808 or NCT04357860 or NCT04386239 or NCT04315298 or NCT04359901 or NCT04321993 or "2015-002340-14" or "2020-001162-12" or "2020-001367-88" or "2020-001246-18" or "2020-001634-36" or "2020-001531-27" or "2020-001255-40" or "2020-001275-32" or "2020-001255-40" or "2020-001275-32" or "2020-001290-74").af. (5)

69 (NCT04306705 or NCT04310228 or NCT04332094 or NCT04335305 or NCT03446355 or "2020-001275-32" or "2020-001437-12" or "2020-001500-41" or ChiCTR2000029765 or ChiCTR2000030580 or NCT04320615 or NCT04322773 or NCT04324047 or NCT04331795 or NCT04333914).af. (1)

70 ("2020-001903-17" or NCT04335084 or NCT04334512 or "2020-002312-43" or IRCT20140305016852N4 or IRCT20200324046850N1 or "2020-001363-85" or NCT04344041 or "2020-001602-34" or IRCT20110726007117N11 or NCT04334005 or "2020-002287-31" or "2020-001960-28" or IRCT20200319046819N1 or NCT04351490 or NCT04385940 or IRCT20200401046909N2 or NCT04483635 or NCT04400890 or CTRI202006026189 or "CTRI-2020-06-026189" or NCT04476680 or NCT04459247 or NCT04363840 or NCT04395768 or ACTRN12620000557932 or NCT04449718 or NCT04407286).af. (3)

71 (NCT04334629 or "2020-001203-16" or NCT04382768 or NCT04500639).af. (0)

72 ChiCTR2000031630.af. (0)

73 ("2020-003278-37" or NCT04518410 or NCT04501978 or NCT04497987 or NCT04427501 or NCT04411628).af. (3)

74 (NCT04519437 or NCT04452318 or NCT04425629 or NCT04426695 or NCT04381936 or "R10933-10987-HV-2093" or "R10933-10987-COV-2069" or "R10933-10987-COV-2067" or "R10933-10987-COV-2066" or "2020-001113-21" or ISRCTN50189673).af. (5)

75 ("CTRI-2020-07-026791" or "CTRI-2020-08-027503" or NCT4324463 or NCT04333407 or NCT04343001 or NCT04363840 or NCT04365309 or NCT04368377 or NCT04466670 or NCT04498273).af. (3)

76 or/28-75 (489545)

77 27 and 76 (4281)

78 26 and 76 (5494)

79 exp coronavirus/ (45624)

80 exp Coronavirus Infections/ (49830)

81 (corona\* adj1 (virus\* or viral\*)).ti,ab,kw,kf. (2935)

- 82 (corono\* adj1 (virus\* or viral\*).ti,ab,kw,kf. (2)
- 83 coronavirus\*.ti,ab,kw,kf. (53545)
- 84 coronovirus\*.ti,ab,kw,kf. (43)
- 85 coronavirinae\*.ti,ab,kw,kf. (23)
- 86 CoV.ti,ab,kw,kf. (39127)
- 87 ("2019-nCoV\*" or 2019nCoV\* or "19-nCoV\*" or 19nCoV\* or nCoV2019\* or "nCoV-2019\*" or nCoV19\* or "nCoV-19\*).ti,ab,kw,kf. (1622)
- 88 ("COVID-19\*" or COVID19\* or "COVID-2019\*" or covid).ti,ab,kw,kf. (94025)
- 89 ("HCoV-19\*" or HCoV19\* or "HCoV-2019\*" or HCoV2019\*).ti,ab,kw,kf. (25)
- 90 ("2019 novel\*" or Ncov\* or "n-cov").ti,ab,kw,kf. (2722)
- 91 ("SARS-CoV-2\*" or "SARSCoV-2\*" or "SARSCoV2\*" or "SARS-CoV2\*).ti,ab,kw,kf. (34299)
- 92 (SARSCov19\* or "SARS-Cov19\*" or "SARSCov-19\*" or "SARS-Cov-19\*" or SARSCov2019\* or "SARS-Cov2019\*" or "SARSCov-2019\*" or "SARS-Cov-2019\*).ti,ab,kw,kf. (58)
- 93 (SARS2\* or "SARS-2\*).ti,ab,kw,kf. (164)
- 94 (SARScoronavirus2\* or "SARS-coronavirus-2\*).ti,ab,kw,kf. (223)
- 95 (respiratory\* adj2 (symptom\* or disease\* or illness\* or condition\*) adj5 (Wuhan\* or Hubei\* or China\* or Chinese\* or Huanan\*).ti,ab,kw,kf. (324)
- 96 ("seafood market\*" or "food market\*") adj10 (Wuhan\* or Hubei\* or China\* or Chinese\* or Huanan\*).ti,ab,kw,kf. (99)
- 97 (pneumonia\* adj3 (Wuhan\* or Hubei\* or China\* or Chinese\* or Huanan\*).ti,ab,kw,kf. (578)
- 98 ((outbreak\* or wildlife\* or pandemic\* or epidemic\*) adj1 (Wuhan\* or Hubei\* or China\* or Chinese\* or Huanan\*).ti,ab,kw,kf. (366)
- 99 "severe acute respiratory syndrome\*.ti,ab,kw,kf. (17413)
- 100 or/79-99 (126978)
- 101 ((100 and english.lg.) not (letter or historical article or comment or editorial or news).pt. not (Animals/ not humans/)) and ("2020\*" or "2021\*).yr. (78535)
- 102 76 and 101 (4281)
- 103 76 and 100 (5494)
- 104 77 not 102 (0)
- 105 78 not 103 (0)

**Table 5. Strategy A NOT Strategy C (with drugs and clinical trials)**

Database: Ovid MEDLINE(R) ALL <1946 to February 15, 2021>

Search Strategy:

- 
- 1 exp coronavirus/ (45624)
  - 2 exp Coronavirus Infections/ (49830)
  - 3 (corona\* adj1 (virus\* or viral\*)).ti,ab,kw,kf. (2935)
  - 4 (corona\* adj1 virinae\*).ti,ab,kw,kf. (0)
  - 5 (corono\* adj1 (virus\* or viral\*)).ti,ab,kw,kf. (2)
  - 6 (corono\* adj1 virinae\*).ti,ab,kw,kf. (0)
  - 7 coronavirus\*.ti,ab,kw,kf. (53545)
  - 8 coronavirus\*.ti,ab,kw,kf. (43)
  - 9 coronavirinae\*.ti,ab,kw,kf. (23)
  - 10 coronavirinae\*.ti,ab,kw,kf. (0)
  - 11 CoV.ti,ab,kw,kf. (39127)
  - 12 ("2019-nCoV\*" or 2019nCoV\* or "19-nCoV\*" or 19nCoV\* or nCoV2019\* or "nCoV-2019\*" or nCoV19\* or "nCoV-19\*").ti,ab,kw,kf. (1622)
  - 13 ("COVID-19\*" or COVID19\* or "COVID-2019\*" or covid).ti,ab,kw,kf. (94025)
  - 14 ("HCoV-19\*" or HCoV19\* or "HCoV-2019\*" or HCoV2019\*).ti,ab,kw,kf. (25)
  - 15 ("2019 novel\*" or Ncov\* or "n-cov").ti,ab,kw,kf. (2722)
  - 16 ("SARS-CoV-2\*" or "SARSCoV-2\*" or "SARSCoV2\*" or "SARS-CoV2\*").ti,ab,kw,kf. (34299)
  - 17 (SARSCov19\* or "SARS-Cov19\*" or "SARSCov-19\*" or "SARS-Cov-19\*" or SARSCov2019\* or "SARS-Cov2019\*" or "SARSCov-2019\*" or "SARS-Cov-2019\*").ti,ab,kw,kf. (58)
  - 18 (SARS2\* or "SARS-2\*").ti,ab,kw,kf. (164)
  - 19 (SARScoronavirus2\* or "SARS-coronavirus-2\*").ti,ab,kw,kf. (223)
  - 20 ("SARScoronavirus 2\*" or "SARS coronavirus2\*").ti,ab,kw,kf. (0)
  - 21 (respiratory\* adj2 (symptom\* or disease\* or illness\* or condition\*) adj5 (Wuhan\* or Hubei\* or China\* or Chinese\* or Huanan\*)).ti,ab,kw,kf. (324)
  - 22 (("seafood market\*" or "food market\*") adj10 (Wuhan\* or Hubei\* or China\* or Chinese\* or Huanan\*)).ti,ab,kw,kf. (99)
  - 23 (pneumonia\* adj3 (Wuhan\* or Hubei\* or China\* or Chinese\* or Huanan\*)).ti,ab,kw,kf. (578)
  - 24 ((outbreak\* or wildlife\* or pandemic\* or epidemic\*) adj1 (Wuhan\* or Hubei\* or China\* or Chinese\* or Huanan\*)).ti,ab,kw,kf. (366)
  - 25 "severe acute respiratory syndrome\*".ti,ab,kw,kf. (17413)
  - 26 or/1-25 (126978)
  - 27 ((26 and english.lg.) not (letter or historical article or comment or editorial or news).pt. not (Animals/ not humans/)) and ("2020\*" or "2021\*").yr. (78535)
  - 28 Interleukin 1 Receptor Antagonist Protein/ (5275)
  - 29 (anakinra\* or kineret\* or IL-1ra or IL1ra or Il-a).tw,kw. (8135)
  - 30 ((interleukin-1 or interleukin1) adj3 (blocker\* or blocking\* or antagonis\* or inhibit\* or agonist\* or agent\*)).tw,kw. (4559)
  - 31 exp Dexamethasone/ (52062)

32 (dexamethasone\* or adrecort\* or adrenocot\* or aereoseb-dex\* or aflucoson\* or alfalyl\* or anaflogistico\* or arcodexan\* or artrosone\* or azium\* or bidexol\* or calonat\* or cebedex\* or cetadexon\* or cilodex\* or colofeam\* or corsona\* or cortastat\* or cortidex\* or cortidron\* or cortisumman\* or dacortina fuerte\* or dalalone\* or danasone\* or decacortin\* or decadelton\* or decaderm\* or decadion\* or decadran\* or decadron\* or decaesadril\* or decaject\* or decameth\* or decasone\* or decaspray\* or decasterolone\* or decdan\* or decilone\* or decofluor\* or dectancyl\* or dekacort\* or delladec\* or deltafluoren\* or dergramin\* or deronil\* or desacort\* or desadrene\* or desalark\* or desameton\* or desigdron\* or dexa cortisyl\* or dexa dabrosan\* or dexa korti\* or dexa scherosan\* or dexa scherozon\* or dexacen\* or dexachel\* or dexacort\* or dexadabrosan\* or dexadecadrol\* or dexadrol\* or dexagel\* or dexagen\* or dexahelvacort\* or dexakorti\* or dexalien\* or dexalocal\* or dexame\* or dexameth\* or dexamonozon\* or dexan\* or dexapot\* or dexascherosan\* or dexascherozon\* or dexason\* or dexinoral\* or dexionil\* or dexmethsone\* or dexona\* or dexone\* or dexpak\* or dexsol\* or dextelan\* or dextrasone\* or dexycu\* or dezone\* or dibasona\* or diodex\* or dropodex\* or esacortene\* or exadion\* or eythalm\* or firmalone\* or fluormethyl prednisolone\* or fluormethylprednisolon\* or fluormone\* or fluorocort\* or fluorodelta\* or fluoromethylprednisolone\* or fortecortin or gammacorten\* or glensoludex\* or grosodexon\* or hexadecadiol\* or hexadecadrol\* or hexadiol\* or hexadrol\* or isnacort\* or isopto dex\* or isopto maxidex\* or isoptodex\* or isoptomaxidex\* or lokalison\* or loverine\* or luxazone\* or martapan\* or marvidione\* or maxidex\* or maxitrol\* or mediamethasone\* or megacortin\* or mephameson\* or metasolon\* or methazon ion\* or methazone ion\* or methazonion\* or methylfluorprednisolone\* or metisone lafi\* or mexasone\* or millicorten\* or millicortenol\* or mk 125 or mk125 or mymethasone\* or neoforderx\* or neofordex\* or nisomethasona\* or novocort\* or nsc 34521 or nsc34521 or oftan-dexa\* or opticorten\* or opticortinol\* or oradexan\* or oradexon\* or orgadrone\* or otomize\* or ozurdex\* or pidexon\* or policort\* or posurdex\* or predni f tablinen\* or predni-f or prednisolone f or prodexon\* or sanamethasone\* or santenson\* or santeson\* or sawasone\* or sofradex\* or solurex\* or spoloven\* or sterasone\* or thilodexine\* or tobradex\* or triamcimetil\* or vexamet\* or visumetazone\* or visumethazone\*).tw,kw.

(61118)

33 Hydrocortisone/ (72699)

34 Hydrocortisone\*.tw,kw. (18867)

35 exp Hydroxychloroquine/ (4310)

36 (Hydroxychloroquin\* or hydroxychlorochin\* or quinoric\* or plaquenil\* or zentiva\*).tw,kw. (6531)

37 exp Plasma/ (27483)

38 (plasma\* adj3 (convalesc\* or therap\* or treatment\* or infusion\*)).tw,kw. (29597)

39 (Remdesivir\* or "GS-5734" or GS5734).tw,kw. (1118)

40 (Sarilumab\* or Kevzara\*).tw,kw. (162)

41 (Tocilizumab\* or RoActemra\* or Actemra\* or Atlizumab\*).tw,kw. (3977)

42 exp Vitamin D/ (60591)

43 exp Vitamin D Deficiency/ (28599)

44 ((vitamin\* adj5 D\*2) or vitaminD\*2).tw,kw. (82484)

45 (ergocalciferol\* or calciferol\* or vs041h42xc or dihydrotachysterol\* or dihydrotachysterin\* or calcamine\* or "67-96-9" or r5lm3h112r or Hydroxyvitamin D\*2 or 25Hydroxyvitamin D\*2 or HydroxyvitaminD\*2 or 25HydroxyvitaminD\*2 or hydroxycalciferol\* or 25hydroxycalciferol\* or hydroxyergocalciferol\* or 25hydroxyergocalciferol\* or ercalcidiol\* or "25(OH)D" or "21343-40-8" or alfacalcidol\* or cholecalciferol\* or colecalciferol\* or calciol\* or "67-97-0" or 1c6v77qf41 or hydroxycholecalciferol\* or hydroxycolecalciferol\* or 25hydroxycholecalciferol\* or 25hydroxycolecalciferol\* or calcifediol\* or calcidiol\* or "19356-17-3" or p6yz13c99q or t0wxw8f54e or dihydroxycholecalciferol\* or dihydroxycolecalciferol\* or 25dihydroxycholecalciferol\* or 25dihydroxycolecalciferol\* or dihydroxyvitamin D\*2 or 25dihydroxyvitamin\* or dihydroxyvitaminD\*2 or calcitriol\* or "32222-06-3" or "40013-87-4" or "55721-11-4").tw,kw. (37055)

46 Ibuprofen/ (9050)

47 (ibuprofen\* or "15687-27-1" or Advil\* or Anadin\* or Ibucalm\* or Ibular\* or Nurofen\* or Brufen\* or Cuprofen\* or Numark\* or Flarin\* or Galpharm\*).tw,kw. (15272)

48 exp Naproxen/ (4169)

49 (naproxen\* or aleve\* or Naprosyn\* or stirlescent\* or Naprosyn\* or anaprox\* or naprox\* or naprelan\*).tw,kw. (6441)

50 exp Indomethacin/ (30337)

51 (Indometacin\* or indomethacin\* or indocid\* or indocin\*).tw,kw. (37047)

52 Celecoxib/ (4455)

53 (Celecoxib\* or celebrex\* or Onsenal\* or Elyxyb\*).tw,kw. (6584)

54 (Nimesulide\* or Nimefen\*).tw,kw. (1614)

55 (Bamlanivimab\* or LY3819253 or "LY-CoV555" or LYCoV555).tw,kw. (20)

56 (casirivimab\* or imdevimab\* or REGN10933 or REGN10987 or "REGN 10933" or "REGN 10987").tw,kw. (8)

57 ((Regeneron\* or REGN) adj4 ("10933" or "10987" or cov2)).tw,kw. (10)

58 Aspirin/ (45592)

59 ((acetylsalicylic\* or acetoxybenzoic\* or "acetyloxy benzoic\*") adj acid\*).tw,kw. (9155)

60 (asa adj (akut\* or cardio\* or direk\* or effect\* or express\* or migraine\* or migrane\* or migren\* or pro or protect\* or ultra\* or zipp\*).tw,kw. (97)

61 (aspirin\* or DB00945 or BAY1019036 or "NSC-27223" or "NSC-406186" or "50-78-2" or r16co5y76e or acenterine\* or acesal\* or acetosal\* or acetylin\* or acetylo\* or acetysal\* or acylpyrin\* or aloxiprimum adiro\* or alabukun\* or "albyl e" or "albyl-e" or "albyl minor\*" or "alka seltzer\*" or alkaspirin\* or andol\* or anopyrin\* or arthralgyl\* or asaa or asacard\* or asae or asaetta\* or asafLOW\* or asaphen\* or aspiricor\* or aspisol\* or "aspo cid" or aspro or asproflash\* or asrivo\* or asta or astrix\* or bamyl\* or bebesan\* or bufferin\* or cafenol\* or caprin\* or cardioasa\* or cardioflow\* or cartia\* or catalgine\* or catalgix\* or claragine\* or colfarit\* or contrheuma\* or darosal\* or dispirin\* or dispril\* or dolean\* or durlaza\* or easprin\* or ecotrin\* or endosprin\* or ecosprin\* or egalgic\* or empirin\* or enterosarine\* or entrophen\* or flamasacard\* or godamed\* or "herz ass" or hjertemagnyl\* or istopirin\* or juvepirine\* or kinderaspirin\* or magnecyl\* or magnyl\* or mejoral\* or melabon\* or micristin\* or micropyrin\* or migrasaa\* or mikrstin\* or miniasal\* or "nu seal\*" or ostoprin\*

or pancemol\* or paracin\* or polopirin\* or polopiryna\* or primaspan\* or pyronoval\* or phonal\* or salospir\* or solprin\* or solupsan\* or sargepirine\* or sedergine\* or solucetyl\* or solupsa\* or "super tru" or tapal\* or "toldex retard\*\*" or treupahlin\* or treuphalin\* or tromalyt\* or turivital\* or vazalore\* or vitalink\* or zorprin\*).tw,kw. (72246)

62 (NCT02735707 or 2015-002340-14 or NCT04330638 or NCT04364009 or NCT04362111 or "2020-001500-41" or NCT04324021 or "2020-001167-93" or NCT04357366 or "2020-001466-11" or NCT04339712 or NCT04341584 or "2020-001039-29").af. (5)

63 ("2020-001113-21" or ISRCTN50189673 or NCT04347980 or NCT04327401 or NCT04346355 or "2020-001333-13" or NCT04344730 or "2020-001457-43" or NCT04325061 or "2020-001278-31").af. (4)

64 (NCT02735707 or "2015-002340-14" or NCT04381936 or "2020-001113-21" or ISRCTN50189673 or "ISRCTN 50189673" or NCT04348305 or "2020-001395-15" or NCT04359511).af. (7)

65 (NCT04325893 or HYCOVID or "49RC20-0071" or NCT04328467 or STUDY00009414 or NCT04329611 or "ABCOV-01" or NCT04331834 or "PrEP\_COVID" or NCT04334382 or HyAzOUT or "1051360" or NCT04334928 or EPICOS or "PrEP COVID-19" or NCT04341441 or "WHIP COVID-19" or "1410401" or NCT04344379 or "PREP-COVID" or APHP200386 or NCT04345861 or COVIDOC or "RECHMPL20-168" or NCT04347980 or DHYSCO or "2037815010" or NCT04321616 or "118684" or NCT04328961 or STUDY00009750 or NCT04341870 or "CORIMUNO-VIRO" or "APHP200375-3" or NCT04351724 or ACOVACT or NCT04353271 or "1582736-1" or "2020-001765-37" or NCT04307693 or "S2020-0472-0001" or NCT04329832 or HAHPS or "1051355" or NCT04332094 or TOCOVID or "IIBSP-COV-2020-23" or NCT04333225 or "020-132" or NCT04342221 or "COV-HCQ" or NCT04346147 or "Covid-19HUF" or "24032020" or NCT04347031 or NCT04344457 or "HIZ-PRC-COVID-19" or NCT04333654 or EFC16855 or "2020-001269-35" or "U1111-1249-6168" or NCT04351620 or "IRB20-0572").af. (45)

66 (NCT04373460 or IRB00247590 or NCT04372979 or "2020-A01166-33" or NCT04372368 or NCT04366245 or NCT04365439 or NCT04364737 or NCT04363034 or NCT04362176 or NCT04361253 or NCT04360486 or ASCoV2CP or NCT04359810 or AAAS9924 or NCT04358783 or "IF20-00002" or NCT04358211 or NCT04357106 or "CHMI-030420-01" or NCT04356534 or NCT04356482 or TERAPLASCOV2 or NCT04355897 or NCT04355767 or NCT04354831 or PRO00037712 or NCT04353206 or NCT04352751 or NCT04348877 or NCT04348656 or "CONCOR-1" or NCT04347681 or HAEM0321 or NCT04346589 or NCT04346446 or "ILBS-COVID-02" or NCT04345679 or AntiCOVID19ORT or NCT04345523 or "ConPlas-19" or NCT04345289 or "2020-001367-88" or NCT04344535 or "SBU-COVID19\*" or NCT04344015 or NCT04343755 or "Pro2020-0375" or NCT04343261 or "SFH-20-23" or NCT04342182 or "ConCoVid-19" or NCT04340050 or "IRB20-0523" or NCT04338360 or "20-003312" or NCT04333355 or NCT04333251 or NCT04332835 or "ABN011-2" or NCT04332380 or "ABN011-1" or NCT04327349 or IRCT20181104041551N1 or NCT04325672 or "20-002864" or NCT04323800 or IRB00245634 or NCT04321421 or IRCCSSanMatteoH or "COV19-PLASMA" or NCT04264858 or ChiCTR2000030841 or "WuhanUH-2019 nCoV-Ig" or NCT04292340 or

ChiCTR2000030929 or ChiCTR2000030702 or ChiCTR2000030627 or  
ChiCTR2000030179 or ChiCTR2000030046 or ChiCTR2000030039 or  
ChiCTR2000030010 or ChiCTR2000029850 or ChiCTR2000029757 or "2020-  
001632-10" or "2020-001310-38" or "CAPSID2020-DRK-BSD" or  
NCT04374370 or NCT04374487 or "MHC-COVID-19-CP" or NCT04374526  
or NCT04374565 or NCT04375098 or NCT04376788 or NCT04377672 or  
IRB00247557 or NCT04377568 or NCT04376034).af. (17)

67 ("2020-001052-18" or "2020-001366-11" or NCT04252664 or  
NCT04257656 or NCT04292730 or NCT04292899 or NCT04302766 or  
NCT04315948 or NCT04321616 or NCT04323761).af. (9)

68 (NCT02735707 or NCT04327388 or NCT04345289 or NCT04324073 or  
NCT04341870 or NCT04322773 or NCT04357808 or NCT04357860 or  
NCT04386239 or NCT04315298 or NCT04359901 or NCT04321993 or  
"2015-002340-14" or "2020-001162-12" or "2020-001367-88" or "2020-  
001246-18" or "2020-001634-36" or "2020-001531-27" or "2020-001255-40"  
or "2020-001275-32" or "2020-001255-40" or "2020-001275-32" or "2020-  
001290-74").af. (5)

69 (NCT04306705 or NCT04310228 or NCT04332094 or NCT04335305 or  
NCT03446355 or "2020-001275-32" or "2020-001437-12" or "2020-001500-  
41" or ChiCTR2000029765 or ChiCTR2000030580 or NCT04320615 or  
NCT04322773 or NCT04324047 or NCT04331795 or NCT04333914).af. (1)

70 ("2020-001903-17" or NCT04335084 or NCT04334512 or "2020-  
002312-43" or IRCT20140305016852N4 or IRCT20200324046850N1 or  
"2020-001363-85" or NCT04344041 or "2020-001602-34" or  
IRCT20110726007117N11 or NCT04334005 or "2020-002287-31" or "2020-  
001960-28" or IRCT20200319046819N1 or NCT04351490 or NCT04385940  
or IRCT20200401046909N2 or NCT04483635 or NCT04400890 or  
CTRI202006026189 or "CTRI-2020-06-026189" or NCT04476680 or  
NCT04459247 or NCT04363840 or NCT04395768 or  
ACTRN12620000557932 or NCT04449718 or NCT04407286).af. (3)

71 (NCT04334629 or "2020-001203-16" or NCT04382768 or  
NCT04500639).af. (0)

72 ChiCTR2000031630.af. (0)

73 ("2020-003278-37" or NCT04518410 or NCT04501978 or  
NCT04497987 or NCT04427501 or NCT04411628).af. (3)

74 (NCT04519437 or NCT04452318 or NCT04425629 or NCT04426695 or  
NCT04381936 or "R10933-10987-HV-2093" or "R10933-10987-COV-2069" or  
"R10933-10987-COV-2067" or "R10933-10987-COV-2066" or "2020-001113-  
21" or ISRCTN50189673).af. (5)

75 ("CTRI-2020-07-026791" or "CTRI-2020-08-027503" or NCT4324463 or  
NCT04333407 or NCT04343001 or NCT04363840 or NCT04365309 or  
NCT04368377 or NCT04466670 or NCT04498273).af. (3)

76 or/28-75 (489545)

77 27 and 76 (4281)

78 26 and 76 (5494)

79 exp coronavirus/ (45624)

80 exp Coronavirus Infections/ (49830)

81 (corona\* adj1 (virus\* or viral\*)).ti,ab,kw,kf. (2935)

82 coronavirus\*.ti,ab,kw,kf. (53545)

83 CoV.ti,ab,kw,kf. (39127)

84 ("2019-nCoV\*" or 2019nCoV\* or "19-nCoV\*" or 19nCoV\* or nCoV2019\*  
or "nCoV-2019\*" or nCoV19\* or "nCoV-19\*").ti,ab,kw,kf. (1622)

85 ("COVID-19\*" or COVID19\* or "COVID-2019\*" or covid).ti,ab,kw,kf.  
(94025)

86 ("2019 novel\*" or Ncov\* or "n-cov").ti,ab,kw,kf. (2722)

87 ("SARS-CoV-2\*" or "SARSCoV-2\*" or "SARSCoV2\*" or "SARS-  
CoV2\*").ti,ab,kw,kf. (34299)

88 "severe acute respiratory syndrome".ti,ab,kw,kf. (17413)

89 or/79-88 (126180)

90 ((89 and english.lg.) not (letter or historical article or comment or  
editorial or news).pt. not (Animals/ not humans/)) and ("2020\*" or "2021\*").yr.  
(78422)

91 76 and 90 (4281)

92 76 and 89 (5488)

93 77 not 91 (0)

94 78 not 92 (6)



**Table 5. Strategy A NOT Strategy D (with drugs and clinical trials)**

Database: Ovid MEDLINE(R) ALL <1946 to February 15, 2021>

Search Strategy:

- 
- 1 exp coronavirus/ (45624)
  - 2 exp Coronavirus Infections/ (49830)
  - 3 (corona\* adj1 (virus\* or viral\*)).ti,ab,kw,kf. (2935)
  - 4 (corona\* adj1 virinae\*).ti,ab,kw,kf. (0)
  - 5 (corono\* adj1 (virus\* or viral\*)).ti,ab,kw,kf. (2)
  - 6 (corono\* adj1 virinae\*).ti,ab,kw,kf. (0)
  - 7 coronavirus\*.ti,ab,kw,kf. (53545)
  - 8 coronavirus\*.ti,ab,kw,kf. (43)
  - 9 coronavirinae\*.ti,ab,kw,kf. (23)
  - 10 coronovirinae\*.ti,ab,kw,kf. (0)
  - 11 CoV.ti,ab,kw,kf. (39127)
  - 12 ("2019-nCoV\*" or 2019nCoV\* or "19-nCoV\*" or 19nCoV\* or nCoV2019\* or "nCoV-2019\*" or nCoV19\* or "nCoV-19\*").ti,ab,kw,kf. (1622)
  - 13 ("COVID-19\*" or COVID19\* or "COVID-2019\*" or covid).ti,ab,kw,kf. (94025)
  - 14 ("HCoV-19\*" or HCoV19\* or "HCoV-2019\*" or HCoV2019\*).ti,ab,kw,kf. (25)
  - 15 ("2019 novel\*" or Ncov\* or "n-cov").ti,ab,kw,kf. (2722)
  - 16 ("SARS-CoV-2\*" or "SARSCoV-2\*" or "SARSCoV2\*" or "SARS-CoV2\*").ti,ab,kw,kf. (34299)
  - 17 (SARSCov19\* or "SARS-Cov19\*" or "SARSCov-19\*" or "SARS-Cov-19\*" or SARSCov2019\* or "SARS-Cov2019\*" or "SARSCov-2019\*" or "SARS-Cov-2019\*").ti,ab,kw,kf. (58)
  - 18 (SARS2\* or "SARS-2\*").ti,ab,kw,kf. (164)
  - 19 (SARScoronavirus2\* or "SARS-coronavirus-2\*").ti,ab,kw,kf. (223)
  - 20 ("SARScoronavirus 2\*" or "SARS coronavirus2\*").ti,ab,kw,kf. (0)
  - 21 (respiratory\* adj2 (symptom\* or disease\* or illness\* or condition\*) adj5 (Wuhan\* or Hubei\* or China\* or Chinese\* or Huanan\*)).ti,ab,kw,kf. (324)
  - 22 (("seafood market\*" or "food market\*") adj10 (Wuhan\* or Hubei\* or China\* or Chinese\* or Huanan\*)).ti,ab,kw,kf. (99)
  - 23 (pneumonia\* adj3 (Wuhan\* or Hubei\* or China\* or Chinese\* or Huanan\*)).ti,ab,kw,kf. (578)
  - 24 ((outbreak\* or wildlife\* or pandemic\* or epidemic\*) adj1 (Wuhan\* or Hubei\* or China\* or Chinese\* or Huanan\*)).ti,ab,kw,kf. (366)
  - 25 "severe acute respiratory syndrome\*".ti,ab,kw,kf. (17413)
  - 26 or/1-25 (126978)
  - 27 ((26 and english.lg.) not (letter or historical article or comment or editorial or news).pt. not (Animals/ not humans/)) and ("2020\*" or "2021\*").yr. (78535)
  - 28 Interleukin 1 Receptor Antagonist Protein/ (5275)
  - 29 (anakinra\* or kineret\* or IL-1ra or IL1ra or Il-a).tw,kw. (8135)
  - 30 ((interleukin-1 or interleukin1) adj3 (blocker\* or blocking\* or antagonist\* or inhibit\* or agonist\* or agent\*)).tw,kw. (4559)
  - 31 exp Dexamethasone/ (52062)

32 (dexamethasone\* or adrecort\* or adrenocot\* or aroseb-dex\* or aflucoson\* or alfalyl\* or anaflogistico\* or arcodexan\* or artrosone\* or azium\* or bidexol\* or calonat\* or cebedex\* or cetadexon\* or cilodex\* or colofam\* or corsona\* or cortastat\* or cortidex\* or cortidron\* or cortisumman\* or dacortina fuerte\* or dalalone\* or danasone\* or decacortin\* or decadelton\* or decaderm\* or decadion\* or decadran\* or decadron\* or decaesadril\* or decaject\* or decameth\* or decasone\* or decaspray\* or decasterolone\* or decdan\* or decilone\* or decofluor\* or dectancyl\* or dekacort\* or delladec\* or deltafluoren\* or dergramin\* or deronil\* or desacort\* or desadrene\* or desalark\* or desameton\* or desigdron\* or dexa cortisyl\* or dexa dabrosan\* or dexa korti\* or dexa scherosan\* or dexa scherozon\* or dexacen\* or dexachel\* or dexacort\* or dexadabrosan\* or dexadecadrol\* or dexadrol\* or dexagel\* or dexagen\* or dexahelvacort\* or dexakorti\* or dexalien\* or dexalocal\* or dexame\* or dexameth\* or dexamonozon\* or dexan\* or dexapot\* or dexascheroson\* or dexascherozon\* or dexason\* or dexinoral\* or dexionil\* or dexmethsone\* or dexona\* or dexone\* or dexpak\* or dexsol\* or dextelan\* or dextrason\* or dexycu\* or dezone\* or dibasona\* or diodex\* or dropodex\* or esacortene\* or exadion\* or eythalm\* or firmalone\* or fluormethyl prednisolone\* or fluormethylprednisolon\* or fluormone\* or fluorocort\* or fluorodelta\* or fluoromethylprednisolone\* or fortecortin or gammacorten\* or glensoludex\* or grosodexon\* or hexadecadiol\* or hexadecadrol\* or hexadiol\* or hexadrol\* or isnacort\* or isopto dex\* or isopto maxidex\* or isoptodex\* or isoptomaxidex\* or lokalison\* or loverine\* or luxazone\* or martapan\* or marvidione\* or maxidex\* or maxitrol\* or mediamethasone\* or megacortin\* or mephameson\* or metasolon\* or methazon ion\* or methazone ion\* or methazonion\* or methylfluorprednisolone\* or metisone lafi\* or mexasone\* or millicorten\* or millicortenol\* or mk 125 or mk125 or mymethasone\* or neoforderx\* or neofordex\* or nisomethasona\* or novocort\* or nsc 34521 or nsc34521 or oftan-dexa\* or opticorten\* or opticortinol\* or oradexan\* or oradexon\* or orgadrone\* or otomize\* or ozurdex\* or pidexon\* or policort\* or posurdex\* or predni f tablinen\* or predni-f or prednisolone f or prodexon\* or sanamethasone\* or santenson\* or santeson\* or sawasone\* or sofradex\* or solurex\* or spoloven\* or sterasone\* or thilodexine\* or tobradex\* or triamcimetil\* or vexamet\* or visumetazone\* or visumethazone\*).tw,kw.

(61118)

33 Hydrocortisone/ (72699)

34 Hydrocortisone\*.tw,kw. (18867)

35 exp Hydroxychloroquine/ (4310)

36 (Hydroxychloroquin\* or hydroxychlorochin\* or quinoric\* or plaquenil\* or zentiva\*).tw,kw. (6531)

37 exp Plasma/ (27483)

38 (plasma\* adj3 (convalesc\* or therap\* or treatment\* or infusion\*)).tw,kw. (29597)

39 (Remdesivir\* or "GS-5734" or GS5734).tw,kw. (1118)

40 (Sarilumab\* or Kevzara\*).tw,kw. (162)

41 (Tocilizumab\* or RoActemra\* or Actemra\* or Atlizumab\*).tw,kw. (3977)

42 exp Vitamin D/ (60591)

43 exp Vitamin D Deficiency/ (28599)

44 ((vitamin\* adj5 D\*2) or vitaminD\*2).tw,kw. (82484)

45 (ergocalciferol\* or calciferol\* or vs041h42xc or dihydrotachysterol\* or dihydrotachysterin\* or calcamine\* or "67-96-9" or r5lm3h112r or Hydroxyvitamin D\*2 or 25Hydroxyvitamin D\*2 or HydroxyvitaminD\*2 or 25HydroxyvitaminD\*2 or hydroxycalciferol\* or 25hydroxycalciferol\* or hydroxyergocalciferol\* or 25hydroxyergocalciferol\* or ercalcidiol\* or "25(OH)D" or "21343-40-8" or alfacalcidol\* or cholecalciferol\* or colecalciferol\* or calciol\* or "67-97-0" or 1c6v77qf41 or hydroxycholecalciferol\* or hydroxycolecalciferol\* or 25hydroxycholecalciferol\* or 25hydroxycolecalciferol\* or calcifediol\* or calcidiol\* or "19356-17-3" or p6yz13c99q or t0wxw8f54e or dihydroxycholecalciferol\* or dihydroxycolecalciferol\* or 25dihydroxycholecalciferol\* or 25dihydroxycolecalciferol\* or dihydroxyvitamin D\*2 or 25dihydroxyvitamin\* or dihydroxyvitaminD\*2 or calcitriol\* or "32222-06-3" or "40013-87-4" or "55721-11-4").tw,kw. (37055)

46 Ibuprofen/ (9050)

47 (ibuprofen\* or "15687-27-1" or Advil\* or Anadin\* or Ibucalm\* or Ibular\* or Nurofen\* or Brufen\* or Cuprofen\* or Numark\* or Flarin\* or Galpharm\*).tw,kw. (15272)

48 exp Naproxen/ (4169)

49 (naproxen\* or aleve\* or Naprosyn\* or stirlescent\* or Naprosyn\* or anaprox\* or naprox\* or naprelan\*).tw,kw. (6441)

50 exp Indomethacin/ (30337)

51 (Indometacin\* or indomethacin\* or indocid\* or indocin\*).tw,kw. (37047)

52 Celecoxib/ (4455)

53 (Celecoxib\* or celebrex\* or Onsenal\* or Elyxyb\*).tw,kw. (6584)

54 (Nimesulide\* or Nimefen\*).tw,kw. (1614)

55 (Bamlanivimab\* or LY3819253 or "LY-CoV555" or LYCoV555).tw,kw. (20)

56 (casirivimab\* or imdevimab\* or REGN10933 or REGN10987 or "REGN 10933" or "REGN 10987").tw,kw. (8)

57 ((Regeneron\* or REGN) adj4 ("10933" or "10987" or cov2)).tw,kw. (10)

58 Aspirin/ (45592)

59 ((acetylsalicylic\* or acetoxybenzoic\* or "acetyloxy benzoic\*") adj acid\*).tw,kw. (9155)

60 (asa adj (akut\* or cardio\* or direk\* or effect\* or express\* or migraine\* or migrane\* or migren\* or pro or protect\* or ultra\* or zipp\*).tw,kw. (97)

61 (aspirin\* or DB00945 or BAY1019036 or "NSC-27223" or "NSC-406186" or "50-78-2" or r16co5y76e or acenterine\* or acesal\* or acetosal\* or acetylin\* or acetylo\* or acetysal\* or acylpyrin\* or aloxiprimum adiro\* or alabukun\* or "albyl e" or "albyl-e" or "albyl minor\*" or "alka seltzer\*" or alkaspirin\* or andol\* or anopyrin\* or arthralgyl\* or asaa or asacard\* or asae or asaetta\* or asaflow\* or asaphen\* or aspiricor\* or aspisol\* or "aspo cid" or aspro or asproflash\* or asrivo\* or asta or astrix\* or bamyl\* or bebesan\* or bufferin\* or cafenol\* or caprin\* or cardioasa\* or cardioflow\* or cartia\* or catalgine\* or catalgix\* or claragine\* or colfarit\* or contrheuma\* or darosal\* or dispirin\* or dispril\* or dolean\* or durlaza\* or easprin\* or ecotrin\* or endosprin\* or ecosprin\* or egalgic\* or empirin\* or enterosarine\* or entrophen\* or flamasacard\* or godamed\* or "herz ass" or hjertemagnyl\* or istopirin\* or juvepirine\* or kinderaspirin\* or magnecyl\* or magnyl\* or mejoral\* or melabon\* or micristin\* or micropyrin\* or migrasaa\* or mikrstin\* or miniasal\* or "nu seal\*" or ostoprin\*

or pancemol\* or paracin\* or polopirin\* or polopiryna\* or primaspan\* or pyronoval\* or phonal\* or salospir\* or solprin\* or solupsan\* or sargepirine\* or sedergine\* or solucetyl\* or solupsa\* or "super tru" or tapal\* or "toldex retard\*\*" or treupahlin\* or treuphalin\* or tromalyt\* or turivital\* or vazalore\* or vitalink\* or zorprin\*).tw,kw. (72246)

62 (NCT02735707 or 2015-002340-14 or NCT04330638 or NCT04364009 or NCT04362111 or "2020-001500-41" or NCT04324021 or "2020-001167-93" or NCT04357366 or "2020-001466-11" or NCT04339712 or NCT04341584 or "2020-001039-29").af. (5)

63 ("2020-001113-21" or ISRCTN50189673 or NCT04347980 or NCT04327401 or NCT04346355 or "2020-001333-13" or NCT04344730 or "2020-001457-43" or NCT04325061 or "2020-001278-31").af. (4)

64 (NCT02735707 or "2015-002340-14" or NCT04381936 or "2020-001113-21" or ISRCTN50189673 or "ISRCTN 50189673" or NCT04348305 or "2020-001395-15" or NCT04359511).af. (7)

65 (NCT04325893 or HYCOVID or "49RC20-0071" or NCT04328467 or STUDY00009414 or NCT04329611 or "ABCOV-01" or NCT04331834 or "PrEP\_COVID" or NCT04334382 or HyAzOUT or "1051360" or NCT04334928 or EPICOS or "PrEP COVID-19" or NCT04341441 or "WHIP COVID-19" or "1410401" or NCT04344379 or "PREP-COVID" or APHP200386 or NCT04345861 or COVIDOC or "RECHMPL20-168" or NCT04347980 or DHYSCO or "2037815010" or NCT04321616 or "118684" or NCT04328961 or STUDY00009750 or NCT04341870 or "CORIMUNO-VIRO" or "APHP200375-3" or NCT04351724 or ACOVACT or NCT04353271 or "1582736-1" or "2020-001765-37" or NCT04307693 or "S2020-0472-0001" or NCT04329832 or HAHPS or "1051355" or NCT04332094 or TOCOVID or "IIBSP-COV-2020-23" or NCT04333225 or "020-132" or NCT04342221 or "COV-HCQ" or NCT04346147 or "Covid-19HUF" or "24032020" or NCT04347031 or NCT04344457 or "HIZ-PRC-COVID-19" or NCT04333654 or EFC16855 or "2020-001269-35" or "U1111-1249-6168" or NCT04351620 or "IRB20-0572").af. (45)

66 (NCT04373460 or IRB00247590 or NCT04372979 or "2020-A01166-33" or NCT04372368 or NCT04366245 or NCT04365439 or NCT04364737 or NCT04363034 or NCT04362176 or NCT04361253 or NCT04360486 or ASCoV2CP or NCT04359810 or AAAS9924 or NCT04358783 or "IF20-00002" or NCT04358211 or NCT04357106 or "CHMI-030420-01" or NCT04356534 or NCT04356482 or TERAPLASCOV2 or NCT04355897 or NCT04355767 or NCT04354831 or PRO00037712 or NCT04353206 or NCT04352751 or NCT04348877 or NCT04348656 or "CONCOR-1" or NCT04347681 or HAEM0321 or NCT04346589 or NCT04346446 or "ILBS-COVID-02" or NCT04345679 or AntiCOVID19ORT or NCT04345523 or "ConPlas-19" or NCT04345289 or "2020-001367-88" or NCT04344535 or "SBU-COVID19\*" or NCT04344015 or NCT04343755 or "Pro2020-0375" or NCT04343261 or "SFH-20-23" or NCT04342182 or "ConCoVid-19" or NCT04340050 or "IRB20-0523" or NCT04338360 or "20-003312" or NCT04333355 or NCT04333251 or NCT04332835 or "ABN011-2" or NCT04332380 or "ABN011-1" or NCT04327349 or IRCT20181104041551N1 or NCT04325672 or "20-002864" or NCT04323800 or IRB00245634 or NCT04321421 or IRCCSSanMatteoH or "COV19-PLASMA" or NCT04264858 or ChiCTR2000030841 or "WuhanUH-2019 nCoV-Ig" or NCT04292340 or

ChiCTR2000030929 or ChiCTR2000030702 or ChiCTR2000030627 or  
ChiCTR2000030179 or ChiCTR2000030046 or ChiCTR2000030039 or  
ChiCTR2000030010 or ChiCTR2000029850 or ChiCTR2000029757 or "2020-  
001632-10" or "2020-001310-38" or "CAPSID2020-DRK-BSD" or  
NCT04374370 or NCT04374487 or "MHC-COVID-19-CP" or NCT04374526  
or NCT04374565 or NCT04375098 or NCT04376788 or NCT04377672 or  
IRB00247557 or NCT04377568 or NCT04376034).af. (17)  
67 ("2020-001052-18" or "2020-001366-11" or NCT04252664 or  
NCT04257656 or NCT04292730 or NCT04292899 or NCT04302766 or  
NCT04315948 or NCT04321616 or NCT04323761).af. (9)  
68 (NCT02735707 or NCT04327388 or NCT04345289 or NCT04324073 or  
NCT04341870 or NCT04322773 or NCT04357808 or NCT04357860 or  
NCT04386239 or NCT04315298 or NCT04359901 or NCT04321993 or  
"2015-002340-14" or "2020-001162-12" or "2020-001367-88" or "2020-  
001246-18" or "2020-001634-36" or "2020-001531-27" or "2020-001255-40"  
or "2020-001275-32" or "2020-001255-40" or "2020-001275-32" or "2020-  
001290-74").af. (5)  
69 (NCT04306705 or NCT04310228 or NCT04332094 or NCT04335305 or  
NCT03446355 or "2020-001275-32" or "2020-001437-12" or "2020-001500-  
41" or ChiCTR2000029765 or ChiCTR2000030580 or NCT04320615 or  
NCT04322773 or NCT04324047 or NCT04331795 or NCT04333914).af. (1)  
70 ("2020-001903-17" or NCT04335084 or NCT04334512 or "2020-  
002312-43" or IRCT20140305016852N4 or IRCT20200324046850N1 or  
"2020-001363-85" or NCT04344041 or "2020-001602-34" or  
IRCT20110726007117N11 or NCT04334005 or "2020-002287-31" or "2020-  
001960-28" or IRCT20200319046819N1 or NCT04351490 or NCT04385940  
or IRCT20200401046909N2 or NCT04483635 or NCT04400890 or  
CTRI202006026189 or "CTRI-2020-06-026189" or NCT04476680 or  
NCT04459247 or NCT04363840 or NCT04395768 or  
ACTRN12620000557932 or NCT04449718 or NCT04407286).af. (3)  
71 (NCT04334629 or "2020-001203-16" or NCT04382768 or  
NCT04500639).af. (0)  
72 ChiCTR2000031630.af. (0)  
73 ("2020-003278-37" or NCT04518410 or NCT04501978 or  
NCT04497987 or NCT04427501 or NCT04411628).af. (3)  
74 (NCT04519437 or NCT04452318 or NCT04425629 or NCT04426695 or  
NCT04381936 or "R10933-10987-HV-2093" or "R10933-10987-COV-2069" or  
"R10933-10987-COV-2067" or "R10933-10987-COV-2066" or "2020-001113-  
21" or ISRCTN50189673).af. (5)  
75 ("CTRI-2020-07-026791" or "CTRI-2020-08-027503" or NCT4324463 or  
NCT04333407 or NCT04343001 or NCT04363840 or NCT04365309 or  
NCT04368377 or NCT04466670 or NCT04498273).af. (3)  
76 or/28-75 (489545)  
77 27 and 76 (4281)  
78 26 and 76 (5494)  
79 exp coronavirus/ (45624)  
80 exp Coronavirus Infections/ (49830)  
81 (corona\* adj1 (virus\* or viral\*)).ti,ab,kw,kf. (2935)  
82 coronavirus\*.ti,ab,kw,kf. (53545)

- 83 ("COVID-19\*" or COVID19\* or "COVID-2019\*" or covid).ti,ab,kw,kf.  
(94025)
- 84 ("SARS-CoV-2\*" or "SARSCoV-2\*" or "SARSCoV2\*" or "SARS-  
CoV2\*").ti,ab,kw,kf. (34299)
- 85 or/79-84 (124131)
- 86 ((85 and english.lg.) not (letter or historical article or comment or  
editorial or news).pt. not (Animals/ not humans/)) and ("2020\*" or "2021\*").yr.  
(78183)
- 87 76 and 86 (4279)
- 88 76 and 85 (5472)
- 89 77 not 87 (2)
- 90 78 not 88 (22)

**Table 5. Strategy A NOT Strategy E (with drugs and clinical trials)**

Database: Ovid MEDLINE(R) ALL <1946 to February 15, 2021>

Search Strategy:

- 
- 1 exp coronavirus/ (45624)
  - 2 exp Coronavirus Infections/ (49830)
  - 3 (corona\* adj1 (virus\* or viral\*)).ti,ab,kw,kf. (2935)
  - 4 (corona\* adj1 virinae\*).ti,ab,kw,kf. (0)
  - 5 (corono\* adj1 (virus\* or viral\*)).ti,ab,kw,kf. (2)
  - 6 (corono\* adj1 virinae\*).ti,ab,kw,kf. (0)
  - 7 coronavirus\*.ti,ab,kw,kf. (53545)
  - 8 coronavirus\*.ti,ab,kw,kf. (43)
  - 9 coronavirinae\*.ti,ab,kw,kf. (23)
  - 10 coronovirinae\*.ti,ab,kw,kf. (0)
  - 11 CoV.ti,ab,kw,kf. (39127)
  - 12 ("2019-nCoV\*" or 2019nCoV\* or "19-nCoV\*" or 19nCoV\* or nCoV2019\* or "nCoV-2019\*" or nCoV19\* or "nCoV-19\*").ti,ab,kw,kf. (1622)
  - 13 ("COVID-19\*" or COVID19\* or "COVID-2019\*" or covid).ti,ab,kw,kf. (94025)
  - 14 ("HCoV-19\*" or HCoV19\* or "HCoV-2019\*" or HCoV2019\*).ti,ab,kw,kf. (25)
  - 15 ("2019 novel\*" or Ncov\* or "n-cov").ti,ab,kw,kf. (2722)
  - 16 ("SARS-CoV-2\*" or "SARSCoV-2\*" or "SARSCoV2\*" or "SARS-CoV2\*").ti,ab,kw,kf. (34299)
  - 17 (SARSCov19\* or "SARS-Cov19\*" or "SARSCov-19\*" or "SARS-Cov-19\*" or SARSCov2019\* or "SARS-Cov2019\*" or "SARSCov-2019\*" or "SARS-Cov-2019\*").ti,ab,kw,kf. (58)
  - 18 (SARS2\* or "SARS-2\*").ti,ab,kw,kf. (164)
  - 19 (SARScoronavirus2\* or "SARS-coronavirus-2\*").ti,ab,kw,kf. (223)
  - 20 ("SARScoronavirus 2\*" or "SARS coronavirus2\*").ti,ab,kw,kf. (0)
  - 21 (respiratory\* adj2 (symptom\* or disease\* or illness\* or condition\*) adj5 (Wuhan\* or Hubei\* or China\* or Chinese\* or Huanan\*)).ti,ab,kw,kf. (324)
  - 22 (("seafood market\*" or "food market\*") adj10 (Wuhan\* or Hubei\* or China\* or Chinese\* or Huanan\*)).ti,ab,kw,kf. (99)
  - 23 (pneumonia\* adj3 (Wuhan\* or Hubei\* or China\* or Chinese\* or Huanan\*)).ti,ab,kw,kf. (578)
  - 24 ((outbreak\* or wildlife\* or pandemic\* or epidemic\*) adj1 (Wuhan\* or Hubei\* or China\* or Chinese\* or Huanan\*)).ti,ab,kw,kf. (366)
  - 25 "severe acute respiratory syndrome\*".ti,ab,kw,kf. (17413)
  - 26 or/1-25 (126978)
  - 27 ((26 and english.lg.) not (letter or historical article or comment or editorial or news).pt. not (Animals/ not humans/)) and ("2020\*" or "2021\*").yr. (78535)
  - 28 Interleukin 1 Receptor Antagonist Protein/ (5275)
  - 29 (anakinra\* or kineret\* or IL-1ra or IL1ra or Il-a).tw,kw. (8135)
  - 30 ((interleukin-1 or interleukin1) adj3 (blocker\* or blocking\* or antagonis\* or inhibit\* or agonist\* or agent\*)).tw,kw. (4559)
  - 31 exp Dexamethasone/ (52062)

32 (dexamethasone\* or adrecort\* or adrenocot\* or aroseb-dex\* or aflucoson\* or alfalyl\* or anaflogistico\* or arcodexan\* or artrosone\* or azium\* or bidexol\* or calonat\* or cebedex\* or cetadexon\* or cilodex\* or colofam\* or corsona\* or cortastat\* or cortidex\* or cortidron\* or cortisumman\* or dacortina fuerte\* or dalalone\* or danasone\* or decacortin\* or decadelton\* or decaderm\* or decadion\* or decadran\* or decadron\* or decaesadriil\* or decaject\* or decameth\* or decasone\* or decaspray\* or decasterolone\* or decdan\* or decilone\* or decofluor\* or dectancyl\* or dekaort\* or delladec\* or deltafluoren\* or dergramin\* or deronil\* or desacort\* or desadrene\* or desalark\* or desameton\* or desigdrone\* or dexa cortisyl\* or dexa dabrosan\* or dexa korti\* or dexa scherosan\* or dexa scherozon\* or dexacen\* or dexachel\* or dexacort\* or dexadabrosan\* or dexadecadrol\* or dexadrol\* or dexagel\* or dexagen\* or dexahelvacort\* or dexakorti\* or dexalien\* or dexalocal\* or dexame\* or dexameth\* or dexamonozon\* or dexan\* or dexapot\* or dexascheroson\* or dexascherozon\* or dexason\* or dexinoral\* or dexionil\* or dexmethsone\* or dexona\* or dexone\* or dexpak\* or dexsol\* or dextelan\* or dextrason\* or dexycu\* or dezone\* or dibasona\* or diodex\* or dropodex\* or esacortene\* or exadion\* or eythalm\* or firmalone\* or fluormethyl prednisolone\* or fluormethylprednisolon\* or fluormone\* or fluorocort\* or fluorodelta\* or fluoromethylprednisolone\* or fortocortin or gammacorten\* or glensoludex\* or grosodexon\* or hexadecadiol\* or hexadecadrol\* or hexadiol\* or hexadrol\* or isnacort\* or isopto dex\* or isopto maxidex\* or isoptodex\* or isoptomaxidex\* or lokalison\* or loverine\* or luxazone\* or martapan\* or marvidione\* or maxidex\* or maxitrol\* or mediamethasone\* or megacortin\* or mephameson\* or metasolon\* or methazon ion\* or methazone ion\* or methazonion\* or methylfluorprednisolone\* or metisone lafi\* or mexasone\* or millicorten\* or millicortinol\* or mk 125 or mk125 or mymethasone\* or neoforderx\* or neofordex\* or nisomethasona\* or novocort\* or nsc 34521 or nsc34521 or oftan-dexa\* or opticorten\* or opticortinol\* or oradexan\* or oradexon\* or orgadrone\* or otomize\* or ozurdex\* or pidexon\* or policort\* or posurdex\* or predni f tablinen\* or predni-f or prednisolone f or prodexon\* or sanamethasone\* or santenson\* or santeson\* or sawasone\* or sofradex\* or solurex\* or spoloven\* or sterasone\* or thilodexine\* or tobradex\* or triamcimetil\* or vexamet\* or visumetazone\* or visumethazone\*).tw,kw.

(61118)

33 Hydrocortisone/ (72699)

34 Hydrocortisone\*.tw,kw. (18867)

35 exp Hydroxychloroquine/ (4310)

36 (Hydroxychloroquin\* or hydroxychlorochin\* or quinoric\* or plaquenil\* or zentiva\*).tw,kw. (6531)

37 exp Plasma/ (27483)

38 (plasma\* adj3 (convalesc\* or therap\* or treatment\* or infusion\*)).tw,kw. (29597)

39 (Remdesivir\* or "GS-5734" or GS5734).tw,kw. (1118)

40 (Sarilumab\* or Kevzara\*).tw,kw. (162)

41 (Tocilizumab\* or RoActemra\* or Actemra\* or Atlizumab\*).tw,kw. (3977)

42 exp Vitamin D/ (60591)

43 exp Vitamin D Deficiency/ (28599)

44 ((vitamin\* adj5 D\*2) or vitaminD\*2).tw,kw. (82484)



45 (ergocalciferol\* or calciferol\* or vs041h42xc or dihydrotachysterol\* or dihydrotachysterin\* or calcamine\* or "67-96-9" or r5lm3h112r or Hydroxyvitamin D\*2 or 25Hydroxyvitamin D\*2 or HydroxyvitaminD\*2 or 25HydroxyvitaminD\*2 or hydroxycalciferol\* or 25hydroxycalciferol\* or hydroxyergocalciferol\* or 25hydroxyergocalciferol\* or ercalcidiol\* or "25(OH)D" or "21343-40-8" or alfacalcidol\* or cholecalciferol\* or colecalciferol\* or calciol\* or "67-97-0" or 1c6v77qf41 or hydroxycholecalciferol\* or hydroxycolecalciferol\* or 25hydroxycholecalciferol\* or 25hydroxycolecalciferol\* or calcifediol\* or calcidiol\* or "19356-17-3" or p6yz13c99q or t0wxw8f54e or dihydroxycholecalciferol\* or dihydroxycolecalciferol\* or 25dihydroxycholecalciferol\* or 25dihydroxycolecalciferol\* or dihydroxyvitamin D\*2 or 25dihydroxyvitamin\* or dihydroxyvitaminD\*2 or calcitriol\* or "32222-06-3" or "40013-87-4" or "55721-11-4").tw,kw. (37055)

46 Ibuprofen/ (9050)

47 (ibuprofen\* or "15687-27-1" or Advil\* or Anadin\* or Ibucalm\* or Ibular\* or Nurofen\* or Brufen\* or Cuprofen\* or Numark\* or Flarin\* or Galpharm\*).tw,kw. (15272)

48 exp Naproxen/ (4169)

49 (naproxen\* or aleve\* or Naprosyn\* or stirlescent\* or Naprosyn\* or anaprox\* or naprox\* or naprelan\*).tw,kw. (6441)

50 exp Indomethacin/ (30337)

51 (Indometacin\* or indomethacin\* or indocid\* or indocin\*).tw,kw. (37047)

52 Celecoxib/ (4455)

53 (Celecoxib\* or celebrex\* or Onsenal\* or Elyxyb\*).tw,kw. (6584)

54 (Nimesulide\* or Nimefen\*).tw,kw. (1614)

55 (Bamlanivimab\* or LY3819253 or "LY-CoV555" or LYCoV555).tw,kw. (20)

56 (casirivimab\* or imdevimab\* or REGN10933 or REGN10987 or "REGN 10933" or "REGN 10987").tw,kw. (8)

57 ((Regeneron\* or REGN) adj4 ("10933" or "10987" or cov2)).tw,kw. (10)

58 Aspirin/ (45592)

59 ((acetylsalicylic\* or acetoxybenzoic\* or "acetyloxy benzoic\*") adj acid\*).tw,kw. (9155)

60 (asa adj (akut\* or cardio\* or direk\* or effect\* or express\* or migraine\* or migrane\* or migren\* or pro or protect\* or ultra\* or zipp\*).tw,kw. (97)

61 (aspirin\* or DB00945 or BAY1019036 or "NSC-27223" or "NSC-406186" or "50-78-2" or r16co5y76e or acenterine\* or acesal\* or acetosal\* or acetylin\* or acetylo\* or acetysal\* or acylpyrin\* or aloxiprimum adiro\* or alabukun\* or "albyl e" or "albyl-e" or "albyl minor\*" or "alka seltzer\*" or alkaspirin\* or andol\* or anopyrin\* or arthralgyl\* or asaa or asacard\* or asae or asaetta\* or asafLOW\* or asaphen\* or aspiricor\* or aspisol\* or "aspo cid" or aspro or asproflash\* or asrivo\* or asta or astrix\* or bamyl\* or bebesan\* or bufferin\* or cafenol\* or caprin\* or cardioasa\* or cardioflow\* or cartia\* or catalgine\* or catalgix\* or claragine\* or colfarit\* or contrheuma\* or darosal\* or dispirin\* or dispriL\* or dolean\* or durlaza\* or easprin\* or ecotrin\* or endosprin\* or ecosprin\* or egalgic\* or empirin\* or enterosarine\* or entrophen\* or flamasacard\* or godamed\* or "herz ass" or hjertemagnyl\* or istopirin\* or juvepirine\* or kinderaspirin\* or magnecyl\* or magnyl\* or mejoral\* or melabon\* or micristin\* or micropyrin\* or migrasaa\* or mikrstin\* or miniasal\* or "nu seal\*" or ostoprin\*

or pancemol\* or paracin\* or polopirin\* or polopiryna\* or primaspan\* or pyronoval\* or phonal\* or salospir\* or solprin\* or solupsan\* or sargepirine\* or sedergine\* or solucetyl\* or solupsa\* or "super tru" or tapal\* or "toldex retard\*\*" or treupahlin\* or treuphalin\* or tromalyt\* or turivital\* or vazalore\* or vitalink\* or zorprin\*).tw,kw. (72246)

62 (NCT02735707 or 2015-002340-14 or NCT04330638 or NCT04364009 or NCT04362111 or "2020-001500-41" or NCT04324021 or "2020-001167-93" or NCT04357366 or "2020-001466-11" or NCT04339712 or NCT04341584 or "2020-001039-29").af. (5)

63 ("2020-001113-21" or ISRCTN50189673 or NCT04347980 or NCT04327401 or NCT04346355 or "2020-001333-13" or NCT04344730 or "2020-001457-43" or NCT04325061 or "2020-001278-31").af. (4)

64 (NCT02735707 or "2015-002340-14" or NCT04381936 or "2020-001113-21" or ISRCTN50189673 or "ISRCTN 50189673" or NCT04348305 or "2020-001395-15" or NCT04359511).af. (7)

65 (NCT04325893 or HYCOVID or "49RC20-0071" or NCT04328467 or STUDY00009414 or NCT04329611 or "ABCOV-01" or NCT04331834 or "PrEP\_COVID" or NCT04334382 or HyAzOUT or "1051360" or NCT04334928 or EPICOS or "PrEP COVID-19" or NCT04341441 or "WHIP COVID-19" or "1410401" or NCT04344379 or "PREP-COVID" or APHP200386 or NCT04345861 or COVIDOC or "RECHMPL20-168" or NCT04347980 or DHYSCO or "2037815010" or NCT04321616 or "118684" or NCT04328961 or STUDY00009750 or NCT04341870 or "CORIMUNO-VIRO" or "APHP200375-3" or NCT04351724 or ACOVACT or NCT04353271 or "1582736-1" or "2020-001765-37" or NCT04307693 or "S2020-0472-0001" or NCT04329832 or HAHPS or "1051355" or NCT04332094 or TOCOVID or "IIBSP-COV-2020-23" or NCT04333225 or "020-132" or NCT04342221 or "COV-HCQ" or NCT04346147 or "Covid-19HUF" or "24032020" or NCT04347031 or NCT04344457 or "HIZ-PRC-COVID-19" or NCT04333654 or EFC16855 or "2020-001269-35" or "U1111-1249-6168" or NCT04351620 or "IRB20-0572").af. (45)

66 (NCT04373460 or IRB00247590 or NCT04372979 or "2020-A01166-33" or NCT04372368 or NCT04366245 or NCT04365439 or NCT04364737 or NCT04363034 or NCT04362176 or NCT04361253 or NCT04360486 or ASCoV2CP or NCT04359810 or AAAS9924 or NCT04358783 or "IF20-00002" or NCT04358211 or NCT04357106 or "CHMI-030420-01" or NCT04356534 or NCT04356482 or TERAPLASCOV2 or NCT04355897 or NCT04355767 or NCT04354831 or PRO00037712 or NCT04353206 or NCT04352751 or NCT04348877 or NCT04348656 or "CONCOR-1" or NCT04347681 or HAEM0321 or NCT04346589 or NCT04346446 or "ILBS-COVID-02" or NCT04345679 or AntiCOVID19ORT or NCT04345523 or "ConPlas-19" or NCT04345289 or "2020-001367-88" or NCT04344535 or "SBU-COVID19\*" or NCT04344015 or NCT04343755 or "Pro2020-0375" or NCT04343261 or "SFH-20-23" or NCT04342182 or "ConCoVid-19" or NCT04340050 or "IRB20-0523" or NCT04338360 or "20-003312" or NCT04333355 or NCT04333251 or NCT04332835 or "ABN011-2" or NCT04332380 or "ABN011-1" or NCT04327349 or IRCT20181104041551N1 or NCT04325672 or "20-002864" or NCT04323800 or IRB00245634 or NCT04321421 or IRCCSSanMatteoH or "COV19-PLASMA" or NCT04264858 or ChiCTR2000030841 or "WuhanUH-2019 nCoV-Ig" or NCT04292340 or

ChiCTR2000030929 or ChiCTR2000030702 or ChiCTR2000030627 or  
ChiCTR2000030179 or ChiCTR2000030046 or ChiCTR2000030039 or  
ChiCTR2000030010 or ChiCTR2000029850 or ChiCTR2000029757 or "2020-  
001632-10" or "2020-001310-38" or "CAPSID2020-DRK-BSD" or  
NCT04374370 or NCT04374487 or "MHC-COVID-19-CP" or NCT04374526  
or NCT04374565 or NCT04375098 or NCT04376788 or NCT04377672 or  
IRB00247557 or NCT04377568 or NCT04376034).af. (17)

67 ("2020-001052-18" or "2020-001366-11" or NCT04252664 or  
NCT04257656 or NCT04292730 or NCT04292899 or NCT04302766 or  
NCT04315948 or NCT04321616 or NCT04323761).af. (9)

68 (NCT02735707 or NCT04327388 or NCT04345289 or NCT04324073 or  
NCT04341870 or NCT04322773 or NCT04357808 or NCT04357860 or  
NCT04386239 or NCT04315298 or NCT04359901 or NCT04321993 or  
"2015-002340-14" or "2020-001162-12" or "2020-001367-88" or "2020-  
001246-18" or "2020-001634-36" or "2020-001531-27" or "2020-001255-40"  
or "2020-001275-32" or "2020-001255-40" or "2020-001275-32" or "2020-  
001290-74").af. (5)

69 (NCT04306705 or NCT04310228 or NCT04332094 or NCT04335305 or  
NCT03446355 or "2020-001275-32" or "2020-001437-12" or "2020-001500-  
41" or ChiCTR2000029765 or ChiCTR2000030580 or NCT04320615 or  
NCT04322773 or NCT04324047 or NCT04331795 or NCT04333914).af. (1)

70 ("2020-001903-17" or NCT04335084 or NCT04334512 or "2020-  
002312-43" or IRCT20140305016852N4 or IRCT20200324046850N1 or  
"2020-001363-85" or NCT04344041 or "2020-001602-34" or  
IRCT20110726007117N11 or NCT04334005 or "2020-002287-31" or "2020-  
001960-28" or IRCT20200319046819N1 or NCT04351490 or NCT04385940  
or IRCT20200401046909N2 or NCT04483635 or NCT04400890 or  
CTRI202006026189 or "CTRI-2020-06-026189" or NCT04476680 or  
NCT04459247 or NCT04363840 or NCT04395768 or  
ACTRN12620000557932 or NCT04449718 or NCT04407286).af. (3)

71 (NCT04334629 or "2020-001203-16" or NCT04382768 or  
NCT04500639).af. (0)

72 ChiCTR2000031630.af. (0)

73 ("2020-003278-37" or NCT04518410 or NCT04501978 or  
NCT04497987 or NCT04427501 or NCT04411628).af. (3)

74 (NCT04519437 or NCT04452318 or NCT04425629 or NCT04426695 or  
NCT04381936 or "R10933-10987-HV-2093" or "R10933-10987-COV-2069" or  
"R10933-10987-COV-2067" or "R10933-10987-COV-2066" or "2020-001113-  
21" or ISRCTN50189673).af. (5)

75 ("CTRI-2020-07-026791" or "CTRI-2020-08-027503" or NCT4324463 or  
NCT04333407 or NCT04343001 or NCT04363840 or NCT04365309 or  
NCT04368377 or NCT04466670 or NCT04498273).af. (3)

76 or/28-75 (489545)

77 27 and 76 (4281)

78 26 and 76 (5494)

79 exp coronavirus/ (45624)

80 exp Coronavirus Infections/ (49830)

81 coronavirus\*.ti,ab,kw,kf. (53545)

82 ("COVID-19\*" or COVID19\* or "COVID-2019\*" or covid).ti,ab,kw,kf.  
(94025)

- 83 or/79-82 (121491)
- 84 ((83 and english.lg.) not (letter or historical article or comment or editorial or news).pt. not (Animals/ not humans/)) and ("2020\*" or "2021\*").yr. (76583)
- 85 76 and 84 (4231)
- 86 76 and 83 (5389)
- 87 77 not 85 (50)
- 88 78 not 86 (105)

## Search strategies for Table 6 (Ovid COVID-19 Limit versus Strategy)

### Table 6. Retrieved by Ovid Limit but not Strategy C

Database: Ovid MEDLINE(R) ALL <1946 to February 15, 2021>

Search Strategy:

- 
- 1 exp coronavirus/ (45624)
  - 2 exp Coronavirus Infections/ (49830)
  - 3 (corona\* adj1 (virus\* or viral\*)).ti,ab,kw,kf. (2935)
  - 4 coronavirus\*.ti,ab,kw,kf. (53545)
  - 5 CoV.ti,ab,kw,kf. (39127)
  - 6 ("2019-nCoV\*" or 2019nCoV\* or "19-nCoV\*" or 19nCoV\* or nCoV2019\* or "nCoV-2019\*" or nCoV19\* or "nCoV-19\*").ti,ab,kw,kf. (1622)
  - 7 ("COVID-19\*" or COVID19\* or "COVID-2019\*" or covid).ti,ab,kw,kf. (94025)
  - 8 ("2019 novel\*" or Ncov\* or "n-cov").ti,ab,kw,kf. (2722)
  - 9 ("SARS-CoV-2\*" or "SARSCoV-2\*" or "SARSCoV2\*" or "SARS-CoV2\*").ti,ab,kw,kf. (34299)
  - 10 "severe acute respiratory syndrome\*".ti,ab,kw,kf. (17413)
  - 11 or/1-10 (126180)
  - 12 ((11 and english.lg.) not (letter or historical article or comment or editorial or news).pt. not (Animals/ not humans/)) and ("2020\*" or "2021\*").yr. (78422)
  - 13 docz.dz. (32284548)
  - 14 limit 13 to covid-19 (107058)
  - 15 ((14 and english.lg.) not (letter or historical article or comment or editorial or news).pt. not (Animals/ not humans/)) and ("2020\*" or "2021\*").yr. (78221)
  - 16 15 not 12 (308)

**Table 6. Retrieved by Ovid Limit but not Strategy D**

Database: Ovid MEDLINE(R) ALL <1946 to February 15, 2021>

Search Strategy:

- 
- 1 exp coronavirus/ (45624)
  - 2 exp Coronavirus Infections/ (49830)
  - 3 (corona\* adj1 (virus\* or viral\*)).ti,ab,kw,kf. (2935)
  - 4 coronavirus\*.ti,ab,kw,kf. (53545)
  - 5 ("COVID-19\*" or COVID19\* or "COVID-2019\*" or covid).ti,ab,kw,kf.  
(94025)
  - 6 ("SARS-CoV-2\*" or "SARSCoV-2\*" or "SARSCoV2\*" or "SARS-  
CoV2\*").ti,ab,kw,kf. (34299)
  - 7 or/1-6 (124131)
  - 8 ((7 and english.lg.) not (letter or historical article or comment or editorial  
or news).pt. not (Animals/ not humans/)) and ("2020\*" or "2021\*").yr. (78183)
  - 9 docz.dz. (32284548)
  - 10 limit 9 to covid-19 (107058)
  - 11 ((10 and english.lg.) not (letter or historical article or comment or  
editorial or news).pt. not (Animals/ not humans/)) and ("2020\*" or "2021\*").yr.  
(78221)
  - 12 11 not 8 (332)

## Search strategy for Table 8 (Strategy C versus Ovid COVID-19 Limit)

### **Table 8. Retrieved by Strategy C and not by Ovid COVID-19 Limit**

Database: Ovid MEDLINE(R) ALL <1946 to March 05, 2021>

Search Strategy:

- 
- 1 exp coronavirus/ (61212)
  - 2 exp Coronavirus Infections/ (72897)
  - 3 (corona\* adj1 (virus\* or viral\*)).ti,ab,kw,kf. (3042)
  - 4 coronavirus\*.ti,ab,kw,kf. (55486)
  - 5 CoV.ti,ab,kw,kf. (41033)
  - 6 ("2019-nCoV\*" or 2019nCoV\* or "19-nCoV\*" or 19nCoV\* or nCoV2019\* or "nCoV-2019\*" or nCoV19\* or "nCoV-19\*").ti,ab,kw,kf. (1655)
  - 7 ("COVID-19\*" or COVID19\* or "COVID-2019\*" or covid).ti,ab,kw,kf. (99071)
  - 8 ("2019 novel\*" or Ncov\* or "n-cov").ti,ab,kw,kf. (2762)
  - 9 ("SARS-CoV-2\*" or "SARSCoV-2\*" or "SARSCoV2\*" or "SARS-CoV2\*").ti,ab,kw,kf. (36219)
  - 10 "severe acute respiratory syndrome".ti,ab,kw,kf. (18041)
  - 11 or/1-10 (132621)
  - 12 ((11 and english.lg.) not (letter or historical article or comment or editorial or news).pt. not (Animals/ not humans/)) and ("2020\*" or "2021\*").yr. (83123)
  - 13 docz.dz. (32249123)
  - 14 limit 13 to covid-19 (112836)
  - 15 ((14 and english.lg.) not (letter or historical article or comment or editorial or news).pt. not (Animals/ not humans/)) and ("2020\*" or "2021\*").yr. (82716)
  - 16 12 not 15 (514)

## Comparator for Table 6 and Table 8 (the Ovid COVID-19 Limit)

### **Tables 6 and 8. Ovid MEDLINE Limit (1 December 2020)**

Applying "limit *n* to covid-19" in the strategies above is equivalent to running this full strategy. Source: Wolters Kluwer (2021) [Ovid MEDLINE database guide](#)

- 1 exp Coronavirus/
- 2 exp Coronavirus Infections/
- 3 (coronavirus\* or corona virus\* or OC43 or NL63 or 229E or HKU1 or HCoV\* or ncov\* or covid\* or sars-cov\* or sarscov\* or Sars-coronavirus\* or Severe Acute Respiratory Syndrome Coronavirus\* or "Kawasaki like paediatric inflammatory multisystem syndrome" or "Kawasaki like pediatric inflammatory multisystem syndrome" or "PIMS-TS" or "Kawa-COVID-19" or "MIS-C" or "multisystem inflammatory syndrome in children" or pediatric multisystem inflammatory disease).mp.
- 4 (or/1-3) and ((20191\* or 202\*).dp. or 20190101:20301231.(ep).)
- 5 4 not (SARS or SARS-CoV or MERS or MERS-CoV or Middle East respiratory syndrome or camel\* or dromedar\* or equine or coronary or coronal or covidence\* or covidien or influenza virus or HIV or bovine or calves or TGEV or feline or porcine or BCoV or PED or PEDV or PDCoV or FIPV or FCoV or SADS-CoV or canine or CCov or zoonotic or avian influenza or H1N1 or H5N1 or H5N6 or IBV or murine corona\*).mp.
- 6 ((pneumonia or covid\* or coronavirus\* or corona virus\* or ncov\* or 2019-ncov or sars\*).mp. or exp pneumonia/) and Wuhan.mp.
- 7 (2019-ncov or ncov19 or ncov-19 or 2019-novel CoV or sars-cov2 or sars-cov-2 or sarscov2 or sarscov-2 or SARS-2-nCoV or SARS-2-Cov or SARS-COV-19 or Sars-coronavirus2 or Sars-coronavirus-2 or SARS 2 coronavirus\* or Severe Acute Respiratory Syndrome-CoV-2 or SARS-like coronavirus\* or coronavirus-19 or covid19 or covid-19 or covid 2019 or ((novel or new or nouveau) adj2 (CoV or nCoV or covid or coronavirus\* or corona virus or Pandemi\*2)) or ((covid or covid19 or covid-19 or SARS-CoV-2) and pandemic\*2) or (coronavirus\* and pneumonia)).mp.
- 8 (COVID-19 or SARS-CoV-2).rx,px,ox,rn. or (COVID-19 or COVID-19 serotherapy or ORF7b protein, SARS-CoV-2 or ORF6 protein, SARS-CoV-2 or ORF8 protein, SARS-CoV-2 or pediatric multisystem inflammatory disease, COVID-19 related or envelope protein, SARS-CoV-2 or ORF7a protein, SARS-CoV-2 or spike protein, SARS-CoV-2 or ORF3a protein, SARS-CoV-2 or COVID-19 drug treatment or severe acute respiratory syndrome coronavirus 2 or membrane protein, SARS-CoV-2 or ORF1ab polyprotein, SARS-CoV-2 or nucleocapsid protein, Coronavirus or COVID-19 vaccine or COVID-19 diagnostic testing).os,ps,rn,rs.
- 9 4 and (exp Vaccination/ or exp Vaccines/ or "vaccin\*".rn,ox,px,rx. or vaccin\*.mp. or exp antibodies/ or antibodies.mp. or ("AAVCOVID" or "Ad5-nCoV" or "AdCOVID" or "AdimrSC-2f" or "AG0301-COVID19" or "ARCT-021 OR "LUNAR-COV19" or "AZD1222" or "Bacillus Calmette-Guerin vaccine" or BCG or "bacTRL-Spike" or "BBIBP-CorV" or "BNT162" or "ChAd-SARS-CoV-



2-S" or "CoronaVac" or "COVAX-19" or "Covaxin" or "CVnCoV" or "DelNS1-2019-nCoV-RBD-OPT1" or "EpiVacCorona" or "GRAd-COV2" or "GX-19" or "HaloVax" or "HDT-301" or "INO-4800" or "JNJ-78436735" OR "Ad26.COV2.S" or "LineaDNA" or "LNP-nCoVsaRNA" or "Mechanism" or "Mechanism" or "Mechanism" or "Mechanism" or "mRNA-1273" or "MRT5500" or "NVX-CoV2373" or "PittCoVacc" or "SCB-2019" or "Sputnik V" or "T-COVIDTM" or "UB-612" or "UQ-CSL V451" or "V590" or "V591" or "VIR-7831" or "VXA-CoV2-1" or "ZyCoV-D").mp. or (mRNA vaccine\$ or messenger RNA vaccine\$ or AstraZeneca\$1 or Janssen\$s or Moderna\$1 or Novavax\$1 or Pfizer\$1 or BioNTech\$1).mp.)

10 4 and (Chloroquine or hydroxychloroquine or convalescent plasma or Remdesivir or Veklury or azithromycin or bamlanivimab or "LY CoV555" or corticosteroids or glucocorticoids or "vitamin C" or lopinavir or ritonavir or ivermectin or Tocilizumab or Favipiravir or dexamethasone HIV protease inhibitors).mp.

11 ("32185863" or "32172715" or "32227595" or "32140676" or "32246156" or "32267941" or "32176889" or "32169616" or "32265186" or "32253187" or "32152148" or "32053580" or "32179788" or "32213260" or "32205350" or "32188729" or "32152361" or "32277065" or "32088947" or "32240583" or "31917786" or "32127714" or "32047315" or "32020111" or "32240632" or "32243118" or "32267344" or "32239781" or "32396977" or "32402130" or "32243299" or "32807526" or "32344395" or "32403202" or "32389714" or "32416016" or "32405099" or "32976849" or "32685966" or "33221888" or "32379271" or "32188728" or "32221976" or "32417321" or "32489438" or "32332959" or "32943452" or "32807525" or "32826274" or "32898560" or "32293023" or "33159926" or "32919952" or "32835716" or "32619499" or "32663524" or "32392627" or "32392625" or "33037657" or "32777045" or "32521569" or "32492200" or "32930765" or "33075143" or "32237249" or "32683439" or "32495994" or "32344447" or "32896006" or "32240549" or "32438448" or "32425477" or "32951095" or "32274794" or "32750178" or "32463935" or "32428286" or "32491981" or "32930748" or "32119409" or "32432657" or "33003176" or "32459319" or "32822920" or "32878290" or "32270498" or "32250493" or "32512243" or "32837399" or "32426074" or "32199942" or "32839969" or "32639522" or "33073717" or "32502134" or "32334003" or "32510470" or "32819741" or "32309248" or "32243951" or "32378772" or "32835361" or "32962779" or "32916324" or "32785973" or "32272221" or "32299207" or "33044515" or "33134955" or "32970917" or "32407438" or "32513790" or "32439468" or "33063036" or "33077677" or "32406056" or "32716821" or "32588590" or "32239757" or "32829902" or "32807521" or "32379350" or "33125767" or "32829731" or "32988821" or "32780977" or "32648633" or "32829907" or "32330635" or "32692998" or "33013067" or "33010706" or "32502292" or "32780969" or "32998780" or "32754731" or "32639607" or "32233030" or "32953429" or "32246897" or "32955802" or "32425490" or "32418270" or "32445255" or "32775945" or "32775948" or "32775953" or "32407043").ui.

12 or/5-11

13 12 and 20191201:20301231.(dt).

Last reviewed 1 December 2020.

## Search strategies for Table 10 (refinements to Strategy C)

### ***Line 1. Including MeSH headings from higher in the hierarchy***

Database: Ovid MEDLINE(R) ALL <1946 to March 17, 2021>

Search Strategy:

- 
- 1 exp coronavirus/ (63058)
  - 2 Coronavirus/ or Betacoronavirus/ or SARS-CoV-2/ or Coronavirus Infections/ or COVID-19/ (71820)
  - 3 (corona\* adj1 (virus\* or viral\*)).ti,ab,kw,kf. (3092)
  - 4 coronavirus\*.ti,ab,kw,kf. (56944)
  - 5 CoV.ti,ab,kw,kf. (42320)
  - 6 ("2019-nCoV\*" or 2019nCoV\* or "19-nCoV\*" or 19nCoV\* or nCoV2019\* or "nCoV-2019\*" or nCoV19\* or "nCoV-19\*").ti,ab,kw,kf. (1690)
  - 7 ("COVID-19\*" or COVID19\* or "COVID-2019\*" or covid).ti,ab,kw,kf. (102273)
  - 8 ("2019 novel\*" or Ncov\* or "n-cov").ti,ab,kw,kf. (2807)
  - 9 ("SARS-CoV-2\*" or "SARSCoV-2\*" or "SARSCoV2\*" or "SARS-CoV2\*").ti,ab,kw,kf. (37507)
  - 10 "severe acute respiratory syndrome\*".ti,ab,kw,kf. (18502)
  - 11 or/2-10 (132332)
  - 12 ((11 and english.lg.) not (letter or historical article or comment or editorial or news).pt. not (Animals/ not humans/)) and ("2020\*" or "2021\*").yr. (86156)
  - 13 exp coronavirus/ (63058)
  - 14 exp Coronavirus Infections/ (75539)
  - 15 (corona\* adj1 (virus\* or viral\*)).ti,ab,kw,kf. (3092)
  - 16 coronavirus\*.ti,ab,kw,kf. (56944)
  - 17 CoV.ti,ab,kw,kf. (42320)
  - 18 ("2019-nCoV\*" or 2019nCoV\* or "19-nCoV\*" or 19nCoV\* or nCoV2019\* or "nCoV-2019\*" or nCoV19\* or "nCoV-19\*").ti,ab,kw,kf. (1690)
  - 19 ("COVID-19\*" or COVID19\* or "COVID-2019\*" or covid).ti,ab,kw,kf. (102273)
  - 20 ("2019 novel\*" or Ncov\* or "n-cov").ti,ab,kw,kf. (2807)
  - 21 ("SARS-CoV-2\*" or "SARSCoV-2\*" or "SARSCoV2\*" or "SARS-CoV2\*").ti,ab,kw,kf. (37507)
  - 22 "severe acute respiratory syndrome\*".ti,ab,kw,kf. (18502)
  - 23 or/13-22 (136294)
  - 24 ((23 and english.lg.) not (letter or historical article or comment or editorial or news).pt. not (Animals/ not humans/)) and ("2020\*" or "2021\*").yr. (86158)
  - 25 24 not 12 (2)

## ***Line 1. Adding new MeSH headings for Vaccines and Testing***

Database: Ovid MEDLINE(R) ALL <1946 to March 18, 2021>

Search Strategy:

- 
- 1 exp coronavirus/ (63357)
  - 2 exp Coronavirus Infections/ or exp COVID-19 Testing/ or COVID-19 Vaccines/ (76051)
  - 3 (corona\* adj1 (virus\* or viral\*)).ti,ab,kw,kf. (3099)
  - 4 coronavirus\*.ti,ab,kw,kf. (57113)
  - 5 CoV.ti,ab,kw,kf. (42455)
  - 6 ("2019-nCoV\*" or 2019nCoV\* or "19-nCoV\*" or 19nCoV\* or nCoV2019\* or "nCoV-2019\*" or nCoV19\* or "nCoV-19\*").ti,ab,kw,kf. (1692)
  - 7 ("COVID-19\*" or COVID19\* or "COVID-2019\*" or covid).ti,ab,kw,kf. (102646)
  - 8 ("2019 novel\*" or Ncov\* or "n-cov").ti,ab,kw,kf. (2810)
  - 9 ("SARS-CoV-2\*" or "SARSCoV-2\*" or "SARSCoV2\*" or "SARS-CoV2\*").ti,ab,kw,kf. (37642)
  - 10 "severe acute respiratory syndrome".ti,ab,kw,kf. (18564)
  - 11 or/1-10 (136735)
  - 12 ((11 and english.lg.) not (letter or historical article or comment or editorial or news).pt. not (Animals/ not humans/)) and ("2020\*" or "2021\*").yr. (86521)
  - 13 exp coronavirus/ (63357)
  - 14 exp Coronavirus Infections/ (75931)
  - 15 (corona\* adj1 (virus\* or viral\*)).ti,ab,kw,kf. (3099)
  - 16 coronavirus\*.ti,ab,kw,kf. (57113)
  - 17 CoV.ti,ab,kw,kf. (42455)
  - 18 ("2019-nCoV\*" or 2019nCoV\* or "19-nCoV\*" or 19nCoV\* or nCoV2019\* or "nCoV-2019\*" or nCoV19\* or "nCoV-19\*").ti,ab,kw,kf. (1692)
  - 19 ("COVID-19\*" or COVID19\* or "COVID-2019\*" or covid).ti,ab,kw,kf. (102646)
  - 20 ("2019 novel\*" or Ncov\* or "n-cov").ti,ab,kw,kf. (2810)
  - 21 ("SARS-CoV-2\*" or "SARSCoV-2\*" or "SARSCoV2\*" or "SARS-CoV2\*").ti,ab,kw,kf. (37642)
  - 22 "severe acute respiratory syndrome".ti,ab,kw,kf. (18564)
  - 23 or/13-22 (136722)
  - 24 ((23 and english.lg.) not (letter or historical article or comment or editorial or news).pt. not (Animals/ not humans/)) and ("2020\*" or "2021\*").yr. (86516)
  - 25 11 not 23 (13)
  - 26 12 not 24 (5)
  - 27 exp COVID-19 Testing/ (4574)
  - 28 COVID-19 Vaccines/ (1791)

## ***Line 1. Making MeSH more precise – headings lower in the hierarchy***

Database: Ovid MEDLINE(R) ALL <1946 to April 12, 2021>

Search Strategy:

- 
- 1 exp coronavirus/ (66723)
  - 2 exp Coronavirus Infections/ (80509)
  - 3 (corona\* adj1 (virus\* or viral\*)).ti,ab,kw,kf. (3233)
  - 4 coronavirus\*.ti,ab,kw,kf. (60226)
  - 5 CoV.ti,ab,kw,kf. (45333)
  - 6 ("2019-nCoV\*" or 2019nCoV\* or "19-nCoV\*" or 19nCoV\* or nCoV2019\* or "nCoV-2019\*" or nCoV19\* or "nCoV-19\*").ti,ab,kw,kf. (1739)
  - 7 ("COVID-19\*" or COVID19\* or "COVID-2019\*" or covid).ti,ab,kw,kf. (110260)
  - 8 ("2019 novel\*" or Ncov\* or "n-cov").ti,ab,kw,kf. (2912)
  - 9 ("SARS-CoV-2\*" or "SARSCoV-2\*" or "SARSCoV2\*" or "SARS-CoV2\*").ti,ab,kw,kf. (40540)
  - 10 "severe acute respiratory syndrome\*".ti,ab,kw,kf. (19530)
  - 11 or/1-10 (145362)
  - 12 ((11 and english.lg.) not (letter or historical article or comment or editorial or news).pt. not (Animals/ not humans/)) and ("2020\*" or "2021\*").yr. (93724)
  - 13 SARS-CoV-2/ or COVID-19/ (70753)
  - 14 (corona\* adj1 (virus\* or viral\*)).ti,ab,kw,kf. (3233)
  - 15 coronavirus\*.ti,ab,kw,kf. (60226)
  - 16 CoV.ti,ab,kw,kf. (45333)
  - 17 ("2019-nCoV\*" or 2019nCoV\* or "19-nCoV\*" or 19nCoV\* or nCoV2019\* or "nCoV-2019\*" or nCoV19\* or "nCoV-19\*").ti,ab,kw,kf. (1739)
  - 18 ("COVID-19\*" or COVID19\* or "COVID-2019\*" or covid).ti,ab,kw,kf. (110260)
  - 19 ("2019 novel\*" or Ncov\* or "n-cov").ti,ab,kw,kf. (2912)
  - 20 ("SARS-CoV-2\*" or "SARSCoV-2\*" or "SARSCoV2\*" or "SARS-CoV2\*").ti,ab,kw,kf. (40540)
  - 21 "severe acute respiratory syndrome\*".ti,ab,kw,kf. (19530)
  - 22 or/13-21 (139524)
  - 23 ((22 and english.lg.) not (letter or historical article or comment or editorial or news).pt. not (Animals/ not humans/)) and ("2020\*" or "2021\*").yr. (93701)
  - 24 12 not 23 (23)

**Line 3. Add (corona\* adj1 pandemic\*)**

Database: Ovid MEDLINE(R) ALL <1946 to March 15, 2021>

Search Strategy:

- 
- 1 exp coronavirus/ (62764)
  - 2 exp Coronavirus Infections/ (75081)
  - 3 (corona\* adj1 (virus\* or viral\* or pandemic\*)).ti,ab,kw,kf. (6128)
  - 4 coronavirus\*.ti,ab,kw,kf. (56720)
  - 5 CoV.ti,ab,kw,kf. (42153)
  - 6 ("2019-nCoV\*" or 2019nCoV\* or "19-nCoV\*" or 19nCoV\* or nCoV2019\* or "nCoV-2019\*" or nCoV19\* or "nCoV-19\*").ti,ab,kw,kf. (1684)
  - 7 ("COVID-19\*" or COVID19\* or "COVID-2019\*" or covid).ti,ab,kw,kf. (101822)
  - 8 ("2019 novel\*" or Ncov\* or "n-cov").ti,ab,kw,kf. (2798)
  - 9 ("SARS-CoV-2\*" or "SARSCoV-2\*" or "SARSCoV2\*" or "SARS-CoV2\*").ti,ab,kw,kf. (37333)
  - 10 "severe acute respiratory syndrome".ti,ab,kw,kf. (18444)
  - 11 or/1-10 (135763)
  - 12 ((11 and english.lg.) not (letter or historical article or comment or editorial or news).pt. not (Animals/ not humans/)) and ("2020\*" or "2021\*").yr. (85683)
  - 13 exp coronavirus/ (62764)
  - 14 exp Coronavirus Infections/ (75081)
  - 15 (corona\* adj1 (virus\* or viral\*)).ti,ab,kw,kf. (3080)
  - 16 coronavirus\*.ti,ab,kw,kf. (56720)
  - 17 CoV.ti,ab,kw,kf. (42153)
  - 18 ("2019-nCoV\*" or 2019nCoV\* or "19-nCoV\*" or 19nCoV\* or nCoV2019\* or "nCoV-2019\*" or nCoV19\* or "nCoV-19\*").ti,ab,kw,kf. (1684)
  - 19 ("COVID-19\*" or COVID19\* or "COVID-2019\*" or covid).ti,ab,kw,kf. (101822)
  - 20 ("2019 novel\*" or Ncov\* or "n-cov").ti,ab,kw,kf. (2798)
  - 21 ("SARS-CoV-2\*" or "SARSCoV-2\*" or "SARSCoV2\*" or "SARS-CoV2\*").ti,ab,kw,kf. (37333)
  - 22 "severe acute respiratory syndrome".ti,ab,kw,kf. (18444)
  - 23 or/13-22 (135735)
  - 24 ((23 and english.lg.) not (letter or historical article or comment or editorial or news).pt. not (Animals/ not humans/)) and ("2020\*" or "2021\*").yr. (85671)
  - 25 12 not 24 (12)

#### **Line 4. Add coron?virus\***

Database: Ovid MEDLINE(R) ALL <1946 to March 15, 2021>

Search Strategy:

```
-----  
1  exp coronavirus/ (62764)  
2  exp Coronavirus Infections/ (75081)  
3  (corona* adj1 (virus* or viral*).ti,ab,kw,kf. (3080)  
4  coron?virus*.ti,ab,kw,kf. (56743)  
5  CoV.ti,ab,kw,kf. (42153)  
6  ("2019-nCoV*" or 2019nCoV* or "19-nCoV*" or 19nCoV* or nCoV2019*  
or "nCoV-2019*" or nCoV19* or "nCoV-19*").ti,ab,kw,kf. (1684)  
7  ("COVID-19*" or COVID19* or "COVID-2019*" or covid).ti,ab,kw,kf.  
(101822)  
8  ("2019 novel*" or Ncov* or "n-cov").ti,ab,kw,kf. (2798)  
9  ("SARS-CoV-2*" or "SARSCoV-2*" or "SARSCoV2*" or "SARS-  
CoV2*").ti,ab,kw,kf. (37333)  
10 "severe acute respiratory syndrome".ti,ab,kw,kf. (18444)  
11 or/1-10 (135738)  
12 ((11 and english.lg.) not (letter or historical article or comment or  
editorial or news).pt. not (Animals/ not humans/)) and ("2020*" or "2021*").yr.  
(85672)  
13 exp coronavirus/ (62764)  
14 exp Coronavirus Infections/ (75081)  
15 (corona* adj1 (virus* or viral*).ti,ab,kw,kf. (3080)  
16 coronavirus*.ti,ab,kw,kf. (56720)  
17 CoV.ti,ab,kw,kf. (42153)  
18 ("2019-nCoV*" or 2019nCoV* or "19-nCoV*" or 19nCoV* or nCoV2019*  
or "nCoV-2019*" or nCoV19* or "nCoV-19*").ti,ab,kw,kf. (1684)  
19 ("COVID-19*" or COVID19* or "COVID-2019*" or covid).ti,ab,kw,kf.  
(101822)  
20 ("2019 novel*" or Ncov* or "n-cov").ti,ab,kw,kf. (2798)  
21 ("SARS-CoV-2*" or "SARSCoV-2*" or "SARSCoV2*" or "SARS-  
CoV2*").ti,ab,kw,kf. (37333)  
22 "severe acute respiratory syndrome".ti,ab,kw,kf. (18444)  
23 or/13-22 (135735)  
24 ((23 and english.lg.) not (letter or historical article or comment or  
editorial or news).pt. not (Animals/ not humans/)) and ("2020*" or "2021*").yr.  
(85671)  
25 12 not 24 (1)
```

**Line 5 not (Coefficient\* or co-efficien\* or covalent\* or covington or covariant\* or covarianc\* or "cut-off value\*" or "cutoff value\*" or "cut-off volume\*" or "cutoff volume\*" or "combined optimi?ation value\*" or "central vessel trunk")**

Database: Ovid MEDLINE(R) ALL <1946 to March 15, 2021>

Search Strategy:

- 
- 1 exp coronavirus/ (62764)
  - 2 exp Coronavirus Infections/ (75081)
  - 3 (corona\* adj1 (virus\* or viral\*)).ti,ab,kw,kf. (3080)
  - 4 coronavirus\*.ti,ab,kw,kf. (56720)
  - 5 (CoV not (Coefficient\* or co-efficien\* or covalent\* or covington or covariant\* or covarianc\* or "cut-off value\*" or "cutoff value\*" or "cut-off volume\*" or "cutoff volume\*" or "combined optimi?ation value\*" or "central vessel trunk")).ti,ab,kw,kf. (40736)
  - 6 ("2019-nCoV\*" or 2019nCoV\* or "19-nCoV\*" or 19nCoV\* or nCoV2019\* or "nCoV-2019\*" or nCoV19\* or "nCoV-19\*").ti,ab,kw,kf. (1684)
  - 7 ("COVID-19\*" or COVID19\* or "COVID-2019\*" or covid).ti,ab,kw,kf. (101822)
  - 8 ("2019 novel\*" or Ncov\* or "n-cov").ti,ab,kw,kf. (2798)
  - 9 ("SARS-CoV-2\*" or "SARSCoV-2\*" or "SARSCoV2\*" or "SARS-CoV2\*").ti,ab,kw,kf. (37333)
  - 10 "severe acute respiratory syndrome".ti,ab,kw,kf. (18444)
  - 11 or/1-10 (134748)
  - 12 ((11 and english.lg.) not (letter or historical article or comment or editorial or news).pt. not (Animals/ not humans/)) and ("2020\*" or "2021\*").yr. (85514)
  - 13 exp coronavirus/ (62764)
  - 14 exp Coronavirus Infections/ (75081)
  - 15 (corona\* adj1 (virus\* or viral\*)).ti,ab,kw,kf. (3080)
  - 16 coronavirus\*.ti,ab,kw,kf. (56720)
  - 17 CoV.ti,ab,kw,kf. (42153)
  - 18 ("2019-nCoV\*" or 2019nCoV\* or "19-nCoV\*" or 19nCoV\* or nCoV2019\* or "nCoV-2019\*" or nCoV19\* or "nCoV-19\*").ti,ab,kw,kf. (1684)
  - 19 ("COVID-19\*" or COVID19\* or "COVID-2019\*" or covid).ti,ab,kw,kf. (101822)
  - 20 ("2019 novel\*" or Ncov\* or "n-cov").ti,ab,kw,kf. (2798)
  - 21 ("SARS-CoV-2\*" or "SARSCoV-2\*" or "SARSCoV2\*" or "SARS-CoV2\*").ti,ab,kw,kf. (37333)
  - 22 "severe acute respiratory syndrome".ti,ab,kw,kf. (18444)
  - 23 or/13-22 (135735)
  - 24 ((23 and english.lg.) not (letter or historical article or comment or editorial or news).pt. not (Animals/ not humans/)) and ("2020\*" or "2021\*").yr. (85671)
  - 25 24 not 12 (157)

## **Line 5 not (CoVR or CoVS)**

Database: Ovid MEDLINE(R) ALL <1946 to March 15, 2021>

Search Strategy:

- 
- 1 exp coronavirus/ (62764)
  - 2 exp Coronavirus Infections/ (75081)
  - 3 (corona\* adj1 (virus\* or viral\*)).ti,ab,kw,kf. (3080)
  - 4 coronavirus\*.ti,ab,kw,kf. (56720)
  - 5 (CoV not (Coefficient\* or co-efficien\* or covalent\* or covington or covariant\* or covarianc\* or "cut-off value\*" or "cutoff value\*" or "cut-off volume\*" or "cutoff volume\*" or "combined optimi?ation value\*" or "central vessel trunk" or CoVR or CoVS)).ti,ab,kw,kf. (40002)
  - 6 ("2019-nCoV\*" or 2019nCoV\* or "19-nCoV\*" or 19nCoV\* or nCoV2019\* or "nCoV-2019\*" or nCoV19\* or "nCoV-19\*").ti,ab,kw,kf. (1684)
  - 7 ("COVID-19\*" or COVID19\* or "COVID-2019\*" or covid).ti,ab,kw,kf. (101822)
  - 8 ("2019 novel\*" or Ncov\* or "n-cov").ti,ab,kw,kf. (2798)
  - 9 ("SARS-CoV-2\*" or "SARSCoV-2\*" or "SARSCoV2\*" or "SARS-CoV2\*").ti,ab,kw,kf. (37333)
  - 10 "severe acute respiratory syndrome\*".ti,ab,kw,kf. (18444)
  - 11 or/1-10 (134731)
  - 12 ((11 and english.lg.) not (letter or historical article or comment or editorial or news).pt. not (Animals/ not humans/)) and ("2020\*" or "2021\*").yr. (85512)
  - 13 exp coronavirus/ (62764)
  - 14 exp Coronavirus Infections/ (75081)
  - 15 (corona\* adj1 (virus\* or viral\*)).ti,ab,kw,kf. (3080)
  - 16 coronavirus\*.ti,ab,kw,kf. (56720)
  - 17 (CoV not (Coefficient\* or co-efficien\* or covalent\* or covington or covariant\* or covarianc\* or "cut-off value\*" or "cutoff value\*" or "cut-off volume\*" or "cutoff volume\*" or "combined optimi?ation value\*" or "central vessel trunk")).ti,ab,kw,kf. (40736)
  - 18 ("2019-nCoV\*" or 2019nCoV\* or "19-nCoV\*" or 19nCoV\* or nCoV2019\* or "nCoV-2019\*" or nCoV19\* or "nCoV-19\*").ti,ab,kw,kf. (1684)
  - 19 ("COVID-19\*" or COVID19\* or "COVID-2019\*" or covid).ti,ab,kw,kf. (101822)
  - 20 ("2019 novel\*" or Ncov\* or "n-cov").ti,ab,kw,kf. (2798)
  - 21 ("SARS-CoV-2\*" or "SARSCoV-2\*" or "SARSCoV2\*" or "SARS-CoV2\*").ti,ab,kw,kf. (37333)
  - 22 "severe acute respiratory syndrome\*".ti,ab,kw,kf. (18444)
  - 23 or/13-22 (134748)
  - 24 ((23 and english.lg.) not (letter or historical article or comment or editorial or news).pt. not (Animals/ not humans/)) and ("2020\*" or "2021\*").yr. (85514)
  - 25 24 not 12 (2)



## **Line 6. Remove variants of nCoV terms**

Database: Ovid MEDLINE(R) ALL <1946 to March 17, 2021>

Search Strategy:

- 
- 1 exp coronavirus/ (63058)
  - 2 exp Coronavirus Infections/ (75539)
  - 3 (corona\* adj1 (virus\* or viral\*)).ti,ab,kw,kf. (3092)
  - 4 coronavirus\*.ti,ab,kw,kf. (56944)
  - 5 CoV.ti,ab,kw,kf. (42320)
  - 6 (2019nCoV\* or 19nCoV\*).ti,ab,kw,kf. (13)
  - 7 ("COVID-19\*" or COVID19\* or "COVID-2019\*" or covid).ti,ab,kw,kf.  
(102273)
  - 8 ("2019 novel\*" or Ncov\* or "n-cov").ti,ab,kw,kf. (2807)
  - 9 ("SARS-CoV-2\*" or "SARSCoV-2\*" or "SARSCoV2\*" or "SARS-  
CoV2\*").ti,ab,kw,kf. (37507)
  - 10 "severe acute respiratory syndrome\*".ti,ab,kw,kf. (18502)
  - 11 or/1-10 (136294)
  - 12 ((11 and english.lg.) not (letter or historical article or comment or  
editorial or news).pt. not (Animals/ not humans/)) and ("2020\*" or "2021\*").yr.  
(86158)
  - 13 exp coronavirus/ (63058)
  - 14 exp Coronavirus Infections/ (75539)
  - 15 (corona\* adj1 (virus\* or viral\*)).ti,ab,kw,kf. (3092)
  - 16 coronavirus\*.ti,ab,kw,kf. (56944)
  - 17 CoV.ti,ab,kw,kf. (42320)
  - 18 ("2019-nCoV\*" or 2019nCoV\* or "19-nCoV\*" or 19nCoV\* or nCoV2019\*  
or "nCoV-2019\*" or nCoV19\* or "nCoV-19\*").ti,ab,kw,kf. (1690)
  - 19 ("COVID-19\*" or COVID19\* or "COVID-2019\*" or covid).ti,ab,kw,kf.  
(102273)
  - 20 ("2019 novel\*" or Ncov\* or "n-cov").ti,ab,kw,kf. (2807)
  - 21 ("SARS-CoV-2\*" or "SARSCoV-2\*" or "SARSCoV2\*" or "SARS-  
CoV2\*").ti,ab,kw,kf. (37507)
  - 22 "severe acute respiratory syndrome\*".ti,ab,kw,kf. (18502)
  - 23 or/13-22 (136294)
  - 24 ((23 and english.lg.) not (letter or historical article or comment or  
editorial or news).pt. not (Animals/ not humans/)) and ("2020\*" or "2021\*").yr.  
(86158)
  - 25 24 not 12 (0)

**Line 7. Add COVID2019\***

Database: Ovid MEDLINE(R) ALL <1946 to March 16, 2021>

Search Strategy:

- 
- 1 exp coronavirus/ (63005)
  - 2 exp Coronavirus Infections/ (75460)
  - 3 (corona\* adj1 (virus\* or viral\*)).ti,ab,kw,kf. (3086)
  - 4 coronavirus\*.ti,ab,kw,kf. (56861)
  - 5 CoV.ti,ab,kw,kf. (42281)
  - 6 ("2019-nCoV\*" or 2019nCoV\* or "19-nCoV\*" or 19nCoV\* or nCoV2019\* or "nCoV-2019\*" or nCoV19\* or "nCoV-19\*").ti,ab,kw,kf. (1689)
  - 7 ("COVID-19\*" or COVID19\* or "COVID-2019\*" or COVID2019\* or covid).ti,ab,kw,kf. (102169)
  - 8 ("2019 novel\*" or Ncov\* or "n-cov").ti,ab,kw,kf. (2803)
  - 9 ("SARS-CoV-2\*" or "SARSCoV-2\*" or "SARSCoV2\*" or "SARS-CoV2\*").ti,ab,kw,kf. (37462)
  - 10 "severe acute respiratory syndrome".ti,ab,kw,kf. (18489)
  - 11 or/1-10 (136157)
  - 12 ((11 and english.lg.) not (letter or historical article or comment or editorial or news).pt. not (Animals/ not humans/)) and ("2020\*" or "2021\*").yr. (85984)
  - 13 exp coronavirus/ (63005)
  - 14 exp Coronavirus Infections/ (75460)
  - 15 (corona\* adj1 (virus\* or viral\*)).ti,ab,kw,kf. (3086)
  - 16 coronavirus\*.ti,ab,kw,kf. (56861)
  - 17 CoV.ti,ab,kw,kf. (42281)
  - 18 ("2019-nCoV\*" or 2019nCoV\* or "19-nCoV\*" or 19nCoV\* or nCoV2019\* or "nCoV-2019\*" or nCoV19\* or "nCoV-19\*").ti,ab,kw,kf. (1689)
  - 19 ("COVID-19\*" or COVID19\* or "COVID-2019\*" or covid).ti,ab,kw,kf. (102169)
  - 20 ("2019 novel\*" or Ncov\* or "n-cov").ti,ab,kw,kf. (2803)
  - 21 ("SARS-CoV-2\*" or "SARSCoV-2\*" or "SARSCoV2\*" or "SARS-CoV2\*").ti,ab,kw,kf. (37462)
  - 22 "severe acute respiratory syndrome".ti,ab,kw,kf. (18489)
  - 23 or/13-22 (136157)
  - 24 ((23 and english.lg.) not (letter or historical article or comment or editorial or news).pt. not (Animals/ not humans/)) and ("2020\*" or "2021\*").yr. (85984)
  - 25 12 not 24 (0)

## **Line 7. Change to COVID\***

Database: Ovid MEDLINE(R) ALL <1946 to March 15, 2021>  
Search Strategy:

-----  
1 exp coronavirus/ (62764)  
2 exp Coronavirus Infections/ (75081)  
3 (corona\* adj1 (virus\* or viral\*).ti,ab,kw,kf. (3080)  
4 coronavirus\*.ti,ab,kw,kf. (56720)  
5 CoV.ti,ab,kw,kf. (42153)  
6 ("2019-nCoV\*" or 2019nCoV\* or "19-nCoV\*" or 19nCoV\* or nCoV2019\*  
or "nCoV-2019\*" or nCoV19\* or "nCoV-19\*").ti,ab,kw,kf. (1684)  
7 ("COVID-19\*" or COVID19\* or "COVID-2019\*" or covid\*).ti,ab,kw,kf.  
(102544)  
8 ("2019 novel\*" or Ncov\* or "n-cov").ti,ab,kw,kf. (2798)  
9 ("SARS-CoV-2\*" or "SARSCoV-2\*" or "SARSCoV2\*" or "SARS-  
CoV2\*").ti,ab,kw,kf. (37333)  
10 "severe acute respiratory syndrome".ti,ab,kw,kf. (18444)  
11 or/1-10 (136445)  
12 ((11 and english.lg.) not (letter or historical article or comment or  
editorial or news).pt. not (Animals/ not humans/)) and ("2020\*" or "2021\*").yr.  
(85806)  
13 exp coronavirus/ (62764)  
14 exp Coronavirus Infections/ (75081)  
15 (corona\* adj1 (virus\* or viral\*).ti,ab,kw,kf. (3080)  
16 coronavirus\*.ti,ab,kw,kf. (56720)  
17 CoV.ti,ab,kw,kf. (42153)  
18 ("2019-nCoV\*" or 2019nCoV\* or "19-nCoV\*" or 19nCoV\* or nCoV2019\*  
or "nCoV-2019\*" or nCoV19\* or "nCoV-19\*").ti,ab,kw,kf. (1684)  
19 ("COVID-19\*" or COVID19\* or "COVID-2019\*" or covid).ti,ab,kw,kf.  
(101822)  
20 ("2019 novel\*" or Ncov\* or "n-cov").ti,ab,kw,kf. (2798)  
21 ("SARS-CoV-2\*" or "SARSCoV-2\*" or "SARSCoV2\*" or "SARS-  
CoV2\*").ti,ab,kw,kf. (37333)  
22 "severe acute respiratory syndrome".ti,ab,kw,kf. (18444)  
23 or/13-22 (135735)  
24 ((23 and english.lg.) not (letter or historical article or comment or  
editorial or news).pt. not (Animals/ not humans/)) and ("2020\*" or "2021\*").yr.  
(85671)  
25 12 not 24 (135)  
26 coidence\*.ti,ab,kw,kf. (163)  
27 25 not 26 (31)  
28 Covidien\*.ti,ab,kw,kf. (530)  
29 27 not 28 (8)

## **Line 7. Change to COVID\*2**

Database: Ovid MEDLINE(R) ALL <1946 to March 15, 2021>  
Search Strategy:

-----  
1 exp coronavirus/ (62764)  
2 exp Coronavirus Infections/ (75081)  
3 (corona\* adj1 (virus\* or viral\*).ti,ab,kw,kf. (3080)  
4 coronavirus\*.ti,ab,kw,kf. (56720)  
5 CoV.ti,ab,kw,kf. (42153)  
6 ("2019-nCoV\*" or 2019nCoV\* or "19-nCoV\*" or 19nCoV\* or nCoV2019\*  
or "nCoV-2019\*" or nCoV19\* or "nCoV-19\*").ti,ab,kw,kf. (1684)  
7 ("COVID-19\*" or COVID19\* or "COVID-2019\*" or covid\*2).ti,ab,kw,kf.  
(101842)  
8 ("2019 novel\*" or Ncov\* or "n-cov").ti,ab,kw,kf. (2798)  
9 ("SARS-CoV-2\*" or "SARSCoV-2\*" or "SARSCoV2\*" or "SARS-  
CoV2\*").ti,ab,kw,kf. (37333)  
10 "severe acute respiratory syndrome".ti,ab,kw,kf. (18444)  
11 or/1-10 (135749)  
12 ((11 and english.lg.) not (letter or historical article or comment or  
editorial or news).pt. not (Animals/ not humans/)) and ("2020\*" or "2021\*").yr.  
(85675)  
13 exp coronavirus/ (62764)  
14 exp Coronavirus Infections/ (75081)  
15 (corona\* adj1 (virus\* or viral\*).ti,ab,kw,kf. (3080)  
16 coronavirus\*.ti,ab,kw,kf. (56720)  
17 CoV.ti,ab,kw,kf. (42153)  
18 ("2019-nCoV\*" or 2019nCoV\* or "19-nCoV\*" or 19nCoV\* or nCoV2019\*  
or "nCoV-2019\*" or nCoV19\* or "nCoV-19\*").ti,ab,kw,kf. (1684)  
19 ("COVID-19\*" or COVID19\* or "COVID-2019\*" or covid).ti,ab,kw,kf.  
(101822)  
20 ("2019 novel\*" or Ncov\* or "n-cov").ti,ab,kw,kf. (2798)  
21 ("SARS-CoV-2\*" or "SARSCoV-2\*" or "SARSCoV2\*" or "SARS-  
CoV2\*").ti,ab,kw,kf. (37333)  
22 "severe acute respiratory syndrome".ti,ab,kw,kf. (18444)  
23 or/13-22 (135735)  
24 ((23 and english.lg.) not (letter or historical article or comment or  
editorial or news).pt. not (Animals/ not humans/)) and ("2020\*" or "2021\*").yr.  
(85671)  
25 12 not 24 (4)

**Line 8. Retain COVID\*2 and remove COVID19**

Database: Ovid MEDLINE(R) ALL <1946 to March 17, 2021>

Search Strategy:

- 
- 1 exp coronavirus/ (63058)
  - 2 exp Coronavirus Infections/ (75539)
  - 3 (corona\* adj1 (virus\* or viral\*)).ti,ab,kw,kf. (3092)
  - 4 coronavirus\*.ti,ab,kw,kf. (56944)
  - 5 CoV.ti,ab,kw,kf. (42320)
  - 6 ("2019-nCoV\*" or 2019nCoV\* or "19-nCoV\*" or 19nCoV\* or nCoV2019\* or "nCoV-2019\*" or nCoV19\* or "nCoV-19\*").ti,ab,kw,kf. (1690)
  - 7 covid\*2.ti,ab,kw,kf. (102291)
  - 8 ("2019 novel\*" or Ncov\* or "n-cov").ti,ab,kw,kf. (2807)
  - 9 ("SARS-CoV-2\*" or "SARSCoV-2\*" or "SARSCoV2\*" or "SARS-CoV2\*").ti,ab,kw,kf. (37507)
  - 10 "severe acute respiratory syndrome\*".ti,ab,kw,kf. (18502)
  - 11 or/1-10 (136308)
  - 12 ((11 and english.lg.) not (letter or historical article or comment or editorial or news).pt. not (Animals/ not humans/)) and ("2020\*" or "2021\*").yr. (86162)
  - 13 exp coronavirus/ (63058)
  - 14 exp Coronavirus Infections/ (75539)
  - 15 (corona\* adj1 (virus\* or viral\*)).ti,ab,kw,kf. (3092)
  - 16 coronavirus\*.ti,ab,kw,kf. (56944)
  - 17 CoV.ti,ab,kw,kf. (42320)
  - 18 ("2019-nCoV\*" or 2019nCoV\* or "19-nCoV\*" or 19nCoV\* or nCoV2019\* or "nCoV-2019\*" or nCoV19\* or "nCoV-19\*").ti,ab,kw,kf. (1690)
  - 19 ("COVID-19\*" or COVID19\* or "COVID-2019\*" or covid).ti,ab,kw,kf. (102273)
  - 20 ("2019 novel\*" or Ncov\* or "n-cov").ti,ab,kw,kf. (2807)
  - 21 ("SARS-CoV-2\*" or "SARSCoV-2\*" or "SARSCoV2\*" or "SARS-CoV2\*").ti,ab,kw,kf. (37507)
  - 22 "severe acute respiratory syndrome\*".ti,ab,kw,kf. (18502)
  - 23 or/13-22 (136294)
  - 24 ((23 and english.lg.) not (letter or historical article or comment or editorial or news).pt. not (Animals/ not humans/)) and ("2020\*" or "2021\*").yr. (86158)
  - 25 24 not 12 (0)

## **Line 8. Truncate "n-cov\*"**

Database: Ovid MEDLINE(R) ALL <1946 to March 15, 2021>

Search Strategy:

-----

- 1 exp coronavirus/ (62764)
- 2 exp Coronavirus Infections/ (75081)
- 3 (corona\* adj1 (virus\* or viral\*).ti,ab,kw,kf. (3080)
- 4 coronavirus\*.ti,ab,kw,kf. (56720)
- 5 CoV.ti,ab,kw,kf. (42153)
- 6 ("2019-nCoV\*" or 2019nCoV\* or "19-nCoV\*" or 19nCoV\* or nCoV2019\*  
or "nCoV-2019\*" or nCoV19\* or "nCoV-19\*").ti,ab,kw,kf. (1684)
- 7 ("COVID-19\*" or COVID19\* or "COVID-2019\*" or covid).ti,ab,kw,kf.  
(101822)
- 8 ("2019 novel\*" or Ncov\* or "n-cov\*").ti,ab,kw,kf. (2880)
- 9 ("SARS-CoV-2\*" or "SARSCoV-2\*" or "SARSCoV2\*" or "SARS-  
CoV2\*").ti,ab,kw,kf. (37333)
- 10 "severe acute respiratory syndrome".ti,ab,kw,kf. (18444)
- 11 or/1-10 (135809)
- 12 ((11 and english.lg.) not (letter or historical article or comment or  
editorial or news).pt. not (Animals/ not humans/)) and ("2020\*" or "2021\*").yr.  
(85677)
- 13 exp coronavirus/ (62764)
- 14 exp Coronavirus Infections/ (75081)
- 15 (corona\* adj1 (virus\* or viral\*).ti,ab,kw,kf. (3080)
- 16 coronavirus\*.ti,ab,kw,kf. (56720)
- 17 CoV.ti,ab,kw,kf. (42153)
- 18 ("2019-nCoV\*" or 2019nCoV\* or "19-nCoV\*" or 19nCoV\* or nCoV2019\*  
or "nCoV-2019\*" or nCoV19\* or "nCoV-19\*").ti,ab,kw,kf. (1684)
- 19 ("COVID-19\*" or COVID19\* or "COVID-2019\*" or covid).ti,ab,kw,kf.  
(101822)
- 20 ("2019 novel\*" or Ncov\* or "n-cov").ti,ab,kw,kf. (2798)
- 21 ("SARS-CoV-2\*" or "SARSCoV-2\*" or "SARSCoV2\*" or "SARS-  
CoV2\*").ti,ab,kw,kf. (37333)
- 22 "severe acute respiratory syndrome".ti,ab,kw,kf. (18444)
- 23 or/13-22 (135735)
- 24 ((23 and english.lg.) not (letter or historical article or comment or  
editorial or news).pt. not (Animals/ not humans/)) and ("2020\*" or "2021\*").yr.  
(85671)
- 25 12 not 24 (6)

## **Line 8. Ncov (without truncation)**

Database: Ovid MEDLINE(R) ALL <1946 to March 15, 2021>

Search Strategy:

-----

- 1 exp coronavirus/ (62764)
- 2 exp Coronavirus Infections/ (75081)
- 3 (corona\* adj1 (virus\* or viral\*)).ti,ab,kw,kf. (3080)
- 4 coronavirus\*.ti,ab,kw,kf. (56720)
- 5 CoV.ti,ab,kw,kf. (42153)
- 6 ("2019-nCoV\*" or 2019nCoV\* or "19-nCoV\*" or 19nCoV\* or nCoV2019\* or "nCoV-2019\*" or nCoV19\* or "nCoV-19\*").ti,ab,kw,kf. (1684)
- 7 ("COVID-19\*" or COVID19\* or "COVID-2019\*" or covid).ti,ab,kw,kf. (101822)
- 8 ("2019 novel\*" or Ncov or "n-cov").ti,ab,kw,kf. (2746)
- 9 ("SARS-CoV-2\*" or "SARSCoV-2\*" or "SARSCoV2\*" or "SARS-CoV2\*").ti,ab,kw,kf. (37333)
- 10 "severe acute respiratory syndrome".ti,ab,kw,kf. (18444)
- 11 or/1-10 (135729)
- 12 ((11 and english.lg.) not (letter or historical article or comment or editorial or news).pt. not (Animals/ not humans/)) and ("2020\*" or "2021\*").yr. (85669)
- 13 exp coronavirus/ (62764)
- 14 exp Coronavirus Infections/ (75081)
- 15 (corona\* adj1 (virus\* or viral\*)).ti,ab,kw,kf. (3080)
- 16 coronavirus\*.ti,ab,kw,kf. (56720)
- 17 CoV.ti,ab,kw,kf. (42153)
- 18 ("2019-nCoV\*" or 2019nCoV\* or "19-nCoV\*" or 19nCoV\* or nCoV2019\* or "nCoV-2019\*" or nCoV19\* or "nCoV-19\*").ti,ab,kw,kf. (1684)
- 19 ("COVID-19\*" or COVID19\* or "COVID-2019\*" or covid).ti,ab,kw,kf. (101822)
- 20 ("2019 novel\*" or Ncov\* or "n-cov").ti,ab,kw,kf. (2798)
- 21 ("SARS-CoV-2\*" or "SARSCoV-2\*" or "SARSCoV2\*" or "SARS-CoV2\*").ti,ab,kw,kf. (37333)
- 22 "severe acute respiratory syndrome".ti,ab,kw,kf. (18444)
- 23 or/13-22 (135735)
- 24 ((23 and english.lg.) not (letter or historical article or comment or editorial or news).pt. not (Animals/ not humans/)) and ("2020\*" or "2021\*").yr. (85671)
- 25 24 not 12 (2)

## Search strategies for Table 12 (comparison of baseline and recommended strategy)

### **Table 12. Comparison of Strategy A, Strategy C, the Recommended Strategy and the Ovid COVID-19 Limit**

Database: Ovid MEDLINE(R) ALL <1946 to April 13, 2021>

Search Strategy:

- 
- 1 exp coronavirus/ (67156)
  - 2 exp Coronavirus Infections/ (81068)
  - 3 (corona\* adj1 (virus\* or viral\*).ti,ab,kw,kf. (3235)
  - 4 (corona\* adj1 virinae\*).ti,ab,kw,kf. (0)
  - 5 (corono\* adj1 (virus\* or viral\*).ti,ab,kw,kf. (2)
  - 6 (corono\* adj1 virinae\*).ti,ab,kw,kf. (0)
  - 7 coronavirus\*.ti,ab,kw,kf. (60375)
  - 8 coronovirus\*.ti,ab,kw,kf. (45)
  - 9 coronavirinae\*.ti,ab,kw,kf. (24)
  - 10 coronovirinae\*.ti,ab,kw,kf. (0)
  - 11 CoV.ti,ab,kw,kf. (45512)
  - 12 ("2019-nCoV\*" or 2019nCoV\* or "19-nCoV\*" or 19nCoV\* or nCoV2019\* or "nCoV-2019\*" or nCoV19\* or "nCoV-19\*").ti,ab,kw,kf. (1748)
  - 13 ("COVID-19\*" or COVID19\* or "COVID-2019\*" or covid).ti,ab,kw,kf. (110656)
  - 14 ("HCoV-19\*" or HCoV19\* or "HCoV-2019\*" or HCoV2019\*).ti,ab,kw,kf. (31)
  - 15 ("2019 novel\*" or Ncov\* or "n-cov").ti,ab,kw,kf. (2921)
  - 16 ("SARS-CoV-2\*" or "SARSCoV-2\*" or "SARSCoV2\*" or "SARS-CoV2\*").ti,ab,kw,kf. (40724)
  - 17 (SARSCov19\* or "SARS-Cov19\*" or "SARSCov-19\*" or "SARS-Cov-19\*" or SARSCov2019\* or "SARS-Cov2019\*" or "SARSCov-2019\*" or "SARS-Cov-2019\*").ti,ab,kw,kf. (70)
  - 18 (SARS2\* or "SARS-2\*").ti,ab,kw,kf. (179)
  - 19 (SARScoronavirus2\* or "SARS-coronavirus-2\*").ti,ab,kw,kf. (248)
  - 20 ("SARScoronavirus 2\*" or "SARS coronavirus2\*").ti,ab,kw,kf. (0)
  - 21 (respiratory\* adj2 (symptom\* or disease\* or illness\* or condition\*) adj5 (Wuhan\* or Hubei\* or China\* or Chinese\* or Huanan\*).ti,ab,kw,kf. (334)
  - 22 (("seafood market\*" or "food market\*") adj10 (Wuhan\* or Hubei\* or China\* or Chinese\* or Huanan\*).ti,ab,kw,kf. (101)
  - 23 (pneumonia\* adj3 (Wuhan\* or Hubei\* or China\* or Chinese\* or Huanan\*).ti,ab,kw,kf. (608)
  - 24 ((outbreak\* or wildlife\* or pandemic\* or epidemic\*) adj1 (Wuhan\* or Hubei\* or China\* or Chinese\* or Huanan\*).ti,ab,kw,kf. (380)
  - 25 "severe acute respiratory syndrome".ti,ab,kw,kf. (19584)
  - 26 or/1-25 (146633)**
  - 27 ((26 and english.lg.) not (letter or historical article or comment or editorial or news).pt. not (Animals/ not humans/)) and ("2020\*" or "2021\*").yr. (94170)
  - 28 exp coronavirus/ (67156)
  - 29 exp Coronavirus Infections/ (81068)



- 30 (corona\* adj1 (virus\* or viral\*)).ti,ab,kw,kf. (3235)
- 31 coronavirus\*.ti,ab,kw,kf. (60375)
- 32 CoV.ti,ab,kw,kf. (45512)
- 33 ("2019-nCoV\*" or 2019nCoV\* or "19-nCoV\*" or 19nCoV\* or nCoV2019\* or "nCoV-2019\*" or nCoV19\* or "nCoV-19\*").ti,ab,kw,kf. (1748)
- 34 ("COVID-19\*" or COVID19\* or "COVID-2019\*" or covid).ti,ab,kw,kf. (110656)
- 35 ("2019 novel\*" or Ncov\* or "n-cov").ti,ab,kw,kf. (2921)
- 36 ("SARS-CoV-2\*" or "SARSCoV-2\*" or "SARSCoV2\*" or "SARS-CoV2\*").ti,ab,kw,kf. (40724)
- 37 "severe acute respiratory syndrome\*.ti,ab,kw,kf. (19584)
- 38 or/28-37 (145820)**
- 39 ((38 and english.lg.) not (letter or historical article or comment or editorial or news).pt. not (Animals/ not humans/)) and ("2020\*" or "2021\*").yr. (94041)
- 40 SARS-CoV-2/ or COVID-19/ (71318)
- 41 (corona\* adj1 (virus\* or viral\*)).ti,ab,kw,kf. (3235)
- 42 (CoV not (Coefficient\* or "co-efficien\*" or covalent\* or Covington\* or covariant\* or covarianc\* or "cut-off value\*" or "cutoff value\*" or "cut-off volume\*" or "cutoff volume\*" or "combined optimi?ation value\*" or "central vessel trunk\*" or CoVR or CoVS)).ti,ab,kw,kf. (43285)
- 43 (coronavirus\* or 2019nCoV\* or 19nCoV\* or "2019 novel\*" or Ncov\* or "n-cov" or "SARS-CoV-2\*" or "SARSCoV-2\*" or SARSCoV2\* or "SARS-CoV2\*" or "severe acute respiratory syndrome\*" or COVID\*2).ti,ab,kw,kf. (135610)
- 44 or/40-43 (138969)**
- 45 ((44 and english.lg.) not (letter or historical article or comment or editorial or news).pt. not (Animals/ not humans/)) and ("2020\*" or "2021\*").yr. (93844)
- 46 docz.dz. (32430019)
- 47 limit 46 to covid-19 (126021)**
- 48 ((47 and english.lg.) not (letter or historical article or comment or editorial or news).pt. not (Animals/ not humans/)) and ("2020\*" or "2021\*").yr. (93583)

## Search strategies for Appendix B (Version history for the NICE COVID-19 search strategy for Ovid MEDLINE)

### **Appendix B. Version 1 (16 March 2020)**

Database: Ovid MEDLINE(R) ALL <1946 to March 13, 2020>

Search Strategy:

- 
- 1 exp coronavirus/ (11203)
  - 2 ((corona\* or corono\*) adj1 (virus\* or viral\*)).ti,ab. (372)
  - 3 (coronavirus\* or coronovirus\* or Coronavirus\* or Wuhan\* or Hubei\* or "2019-nCoV" or 2019nCoV or nCoV2019 or "nCoV-2019" or "COVID-19" or COVID19 or "CORVID-19" or CORVID19 or "WN-CoV" or WNCov or "HCoV-19" or HCoV19 or CoV or "2019 novel\*" or Ncov or "n-cov" or "SARS-CoV-2" or "SARSCoV-2" or "SARSCoV2" or "SARS-CoV2" or SARSCov19 or "SARS-Cov19" or "SARSCov-19" or "SARS-Cov-19" or Ncover or Ncorona\* or Ncorono\* or NcovWuhan\* or NcovHubei\* or NcovChina\* NcovChinese\*).ti,ab. (16777)
  - 4 ((outbreak\* or "respiratory illness\*" or "respiratory disease\*" or "respiratory symptom\*" or "seafood market\*" or "food market\*" or wildlife\*) adj10 (Wuhan\* or Hubei\* or China\* or Chinese\* or Huanan\*)).ti,ab. (2215)
  - 5 "severe acute respiratory syndrome\*".ti,ab. (4550)
  - 6 or/1-5 (24697)
  - 7 limit 6 to yr="2019 -Current" (3092)

## **Appendix B. Version 2 (17 March 2020)**

Database: Ovid MEDLINE(R) ALL <1946 to March 16, 2020>

Search Strategy:

- 
- 1 exp coronavirus/ (11207)
  - 2 ((corona\* or corono\*) adj1 (virus\* or viral\*)).ti,ab,kw. (595)
  - 3 (coronavirus\* or coronovirus\* or Coronavirus\* or Coronovirus\* or Wuhan\* or Hubei\* or "2019-nCoV" or 2019nCoV or nCoV2019 or "nCoV-2019" or "COVID-19" or COVID19 or "CORVID-19" or CORVID19 or "WN-CoV" or WNCov or "HCoV-19" or HCoV19 or CoV or "2019 novel\*" or Ncov or "n-cov" or "SARS-CoV-2" or "SARSCoV-2" or "SARSCoV2" or "SARS-CoV2" or SARSCov19 or "SARS-Cov19" or "SARSCov-19" or "SARS-Cov-19" or Ncover or Ncorona\* or Ncorono\* or NcovWuhan\* or NcovHubei\* or NcovChina\* or NcovChinese\*).ti,ab,kw. (17021)
  - 4 ((outbreak\* or "respiratory illness\*" or "respiratory disease\*" or "respiratory symptom\*" or "seafood market\*" or "food market\*" or wildlife\* or pandemic\* or epidemic\*) adj10 (Wuhan\* or Hubei\* or China\* or Chinese\* or Huanan\*)).ti,ab,kw. (4405)
  - 5 "severe acute respiratory syndrome".ti,ab,kw. (4606)
  - 6 or/8-12 (26839)
  - 7 limit 13 to yr="2019 -Current" (3472)

## **Appendix B. Version 3 (18 March 2020)**

Database: Ovid MEDLINE(R) ALL <1946 to March 17, 2020>

Search Strategy:

- 
- 1 exp coronavirus/ (11252)
  - 2 ((corona\* or corono\*) adj1 (virus\* or viral\*)).ti,ab,kw. (604)
  - 3 (coronavirus\* or coronovirus\* or Coronavirus\* or Coronovirus\* or Wuhan\* or Hubei\* or "2019-nCoV" or 2019nCoV or nCoV2019 or "nCoV-2019" or "COVID-19" or COVID19 or "CORVID-19" or CORVID19 or "WN-CoV" or WNCov or "HCoV-19" or HCoV19 or CoV or "2019 novel\*" or Ncov or "n-cov" or "SARS-CoV-2" or "SARSCoV-2" or "SARSCoV2" or "SARS-CoV2" or SARSCov19 or "SARS-Cov19" or "SARSCov-19" or "SARS-Cov-19" or Ncover or Ncorona\* or Ncorono\* or NcovWuhan\* or NcovHubei\* or NcovChina\* or NcovChinese\*).ti,ab,kw. (17150)
  - 4 ("respiratory illness\*" or "respiratory disease\*" or "respiratory symptom\*" or "seafood market\*" or "food market\*") adj10 (Wuhan\* or Hubei\* or China\* or Chinese\* or Huanan\*).ti,ab,kw. (401)
  - 5 ((outbreak\* or wildlife\* or pandemic\* or epidemic\*) adj1 (Wuhan\* or Hubei\* or China\* or Chinese\* or Huanan\*).ti,ab,kw. (183)
  - 6 "severe acute respiratory syndrome\*".ti,ab,kw. (4619)
  - 7 or/1-6 (23637)
  - 8 limit 7 to yr="2019 -Current" (3216)

## **Appendix B. Version 4 (19 March 2020)**

Database: Ovid MEDLINE(R) ALL <1946 to March 17, 2020>

Search Strategy:

- 
- 1 exp coronavirus/ (11252)
  - 2 ((corona\* or corono\*) adj1 (virus\* or viral\* or virinae\*)).ti,ab,kw. (604)
  - 3 (coronavirus\* or coronovirus\* or coronavirinae\* or Coronavirus\* or Coronovirus\* or Wuhan\* or Hubei\* or Huanan or "2019-nCoV" or 2019nCoV or nCoV2019 or "nCoV-2019" or "COVID-19" or COVID19 or "CORVID-19" or CORVID19 or "WN-CoV" or WNCov or "HCoV-19" or HCoV19 or CoV or "2019 novel\*" or Ncov or "n-cov" or "SARS-CoV-2" or "SARSCoV-2" or "SARSCoV2" or "SARS-CoV2" or SARSCov19 or "SARS-Cov19" or "SARSCov-19" or "SARS-Cov-19" or Ncover or Ncorona\* or Ncorono\* or NcovWuhan\* or NcovHubei\* or NcovChina\* or NcovChinese\*).ti,ab,kw. (17158)
  - 4 (((respiratory\* adj2 (symptom\* or disease\* or illness\* or condition\*)) or "seafood market\*" or "food market\*") adj10 (Wuhan\* or Hubei\* or China\* or Chinese\* or Huanan\*)).ti,ab,kw. (451)
  - 5 ((outbreak\* or wildlife\* or pandemic\* or epidemic\*) adj1 (China\* or Chinese\* or Huanan\*)).ti,ab,kw. (165)
  - 6 "severe acute respiratory syndrome\*".ti,ab,kw. (4619)
  - 7 or/1-6 (23690)
  - 8 limit 7 to yr="2019 -Current" (3220)

## **Appendix B. Version 5 (21 March 2020)**

Database: Ovid MEDLINE(R) ALL <1946 to March 20, 2020>

Search Strategy:

- 
- 1 exp coronavirus/ (11392)
  - 2 exp Coronavirus Infections/ (9675)
  - 3 ((corona\* or corono\*) adj1 (virus\* or viral\* or virinae\*)).ti,ab,kw. (611)
  - 4 (coronavirus\* or coronovirus\* or coronavirinae\* or Coronavirus\* or Coronovirus\* or Wuhan\* or Hubei\* or Huanan or "2019-nCoV" or 2019nCoV or nCoV2019 or "nCoV-2019" or "COVID-19" or COVID19 or "CORVID-19" or CORVID19 or "WN-CoV" or WNCov or "HCoV-19" or HCoV19 or CoV or "2019 novel\*" or Ncov or "n-cov" or "SARS-CoV-2" or "SARSCoV-2" or "SARSCoV2" or "SARS-CoV2" or SARSCov19 or "SARS-Cov19" or "SARSCov-19" or "SARS-Cov-19" or Ncovor or Ncorona\* or Ncorono\* or NcovWuhan\* or NcovHubei\* or NcovChina\* or NcovChinese\*).ti,ab,kw. (17413)
  - 5 (((respiratory\* adj2 (symptom\* or disease\* or illness\* or condition\*)) or "seafood market\*" or "food market\*") adj10 (Wuhan\* or Hubei\* or China\* or Chinese\* or Huanan\*)).ti,ab,kw. (455)
  - 6 ((outbreak\* or wildlife\* or pandemic\* or epidemic\*) adj1 (China\* or Chinese\* or Huanan\*)).ti,ab,kw. (167)
  - 7 "severe acute respiratory syndrome\*".ti,ab,kw. (4649)
  - 8 or/1-6 (25131)
  - 9 limit 8 to yr="2019 -Current" (3470)

## **Appendix B. Version 6 (25 March 2020)**

Database: Ovid MEDLINE(R) ALL <1946 to March 24, 2020>

Search Strategy:

- 
- 1 exp coronavirus/ (11467)
  - 2 exp Coronavirus Infections/ (9776)
  - 3 ((corona\* or corono\*) adj1 (virus\* or viral\* or virinae\*)).ti,ab,kw,kf. (645)
  - 4 (coronavirus\* or coronovirus\* or coronavirinae\* or CoV).ti,ab,kw,kf. (11800)
  - 5 ("2019-nCoV" or 2019nCoV or nCoV2019 or "nCoV-2019" or "COVID-19" or COVID19 or "CORVID-19" or CORVID19 or "WN-CoV" or WNCov or "HCoV-19" or HCoV19 or "2019 novel\*" or Ncov or "n-cov" or "SARS-CoV-2" or "SARSCoV-2" or "SARSCoV2" or "SARS-CoV2" or SARSCov19 or "SARS-Cov19" or "SARSCov-19" or "SARS-Cov-19" or Ncover or Ncorona\* or Ncorono\* or NcovWuhan\* or NcovHubei\* or NcovChina\* or NcovChinese\* or SARS2 or "SARS-2" or SARSCoronavirus2 or "SARS-coronavirus-2" or "SARSCoronavirus 2" or "SARS coronavirus2" or SARSCoronavirus2 or "SARS-coronavirus-2" or "SARSCoronavirus 2" or "SARS coronavirus2").ti,ab,kw,kf. (6596)
  - 6 (((respiratory\* adj2 (symptom\* or disease\* or illness\* or condition\*)) or "seafood market\*" or "food market\*" or pneumonia\*) adj10 (Wuhan\* or Hubei\* or China\* or Chinese\* or Huanan\*)).ti,ab,kw,kf. (1445)
  - 7 ((outbreak\* or wildlife\* or pandemic\* or epidemic\*) adj1 (China\* or Chinese\* or Huanan\*)).ti,ab,kw,kf. (170)
  - 8 "severe acute respiratory syndrome\*".ti,ab,kw,kf. (4704)
  - 9 or/1-8 (23061)
  - 10 limit 9 to yr="2019 -Current" (3393)

## **Appendix B. Version 7 (8 April 2020)**

Database: Ovid MEDLINE(R) ALL <1946 to April 06, 2020>

Search Strategy:

- 
- 1 exp coronavirus/ (11645)
  - 2 exp Coronavirus Infections/ (9968)
  - 3 ((corona\* or corono\*) adj1 (virus\* or viral\* or virinae\*)).ti,ab,kw,kf. (695)
  - 4 (coronavirus\* or coronovirus\* or coronavirinae\* or CoV).ti,ab,kw,kf. (14206)
  - 5 ("2019-nCoV" or 2019nCoV or nCoV2019 or "nCoV-2019" or "COVID-19" or COVID19 or "CORVID-19" or CORVID19 or "WN-CoV" or WNCov or "HCoV-19" or HCoV19 or "2019 novel\*" or Ncov or "n-cov" or "SARS-CoV-2" or "SARSCoV-2" or "SARSCoV2" or "SARS-CoV2" or SARSCov19 or "SARS-Cov19" or "SARSCov-19" or "SARS-Cov-19" or Ncover or Ncorona\* or Ncorono\* or NcovWuhan\* or NcovHubei\* or NcovChina\* or NcovChinese\* or SARS2 or "SARS-2" or SARSCoronavirus2 or "SARS-coronavirus-2" or "SARSCoronavirus 2" or "SARS coronavirus2" or SARSCoronavirus2 or "SARS-coronavirus-2" or "SARSCoronavirus 2" or "SARS coronavirus2").ti,ab,kw,kf. (2946)
  - 6 (respiratory\* adj2 (symptom\* or disease\* or illness\* or condition\*) adj10 (Wuhan\* or Hubei\* or China\* or Chinese\* or Huanan\*)).ti,ab,kw,kf. (418)
  - 7 (("seafood market\*" or "food market\*" or pneumonia\*) adj10 (Wuhan\* or Hubei\* or China\* or Chinese\* or Huanan\*)).ti,ab,kw,kf. (1068)
  - 8 ((outbreak\* or wildlife\* or pandemic\* or epidemic\*) adj1 (Wuhan\* or Hubei\* or China\* or Chinese\* or Huanan\*)).ti,ab,kw. (199)
  - 9 "severe acute respiratory syndrome\*".ti,ab,kw,kf. (4918)
  - 10 or/1-9 (24484)
  - 11 limit 10 to yr="2019 -Current" (4709)



### **Appendix B. Version 8 (16 April 2020)**

Database: Ovid MEDLINE(R) ALL <1946 to April 15, 2020>

Search Strategy:

- 
- 1 exp coronavirus/ (12592)
  - 2 exp Coronavirus Infections/ (11016)
  - 3 ((corona\* or corono\*) adj1 (virus\* or viral\* or virinae\*)).ti,ab,kw,kf. (848)
  - 4 (coronavirus\* or coronovirus\* or coronavirinae\* or CoV).ti,ab,kw,kf. (16600)
  - 5 ("2019-nCoV" or 2019nCoV or nCoV2019 or "nCoV-2019" or nCoV19 or "nCoV-19" or "COVID-19" or COVID19 or "CORVID-19" or CORVID19 or "WN-CoV" or WNCov or "HCoV-19" or HCoV19 or "HCoV-2019" or HCoV2019 or "2019 novel\*" or Ncov or "n-cov" or "SARS-CoV-2" or "SARSCoV-2" or "SARSCoV2" or "SARS-CoV2" or SARSCov19 or "SARS-Cov19" or "SARSCov-19" or "SARS-Cov-19" or Ncover or Ncorona\* or Ncorono\* or NcovWuhan\* or NcovHubei\* or NcovChina\* or NcovChinese\* or SARS2 or "SARS-2" or SARSCoronavirus2 or "SARS-coronavirus-2" or "SARSCoronavirus 2" or "SARS coronavirus2" or SARSCoronavirus2 or "SARS-coronavirus-2" or "SARSCoronavirus 2" or "SARS coronavirus2").ti,ab,kw,kf. (6895)
  - 6 (respiratory\* adj2 (symptom\* or disease\* or illness\* or condition\*) adj10 (Wuhan\* or Hubei\* or China\* or Chinese\* or Huanan\*)).ti,ab,kw,kf. (440)
  - 7 (("seafood market\*" or "food market\*" or pneumonia\*) adj10 (Wuhan\* or Hubei\* or China\* or Chinese\* or Huanan\*)).ti,ab,kw,kf. (1173)
  - 8 ((outbreak\* or wildlife\* or pandemic\* or epidemic\*) adj1 (Wuhan\* or Hubei\* or China\* or Chinese\* or Huanan\*)).ti,ab,kw,kf. (223)
  - 9 "severe acute respiratory syndrome\*".ti,ab,kw,kf. (5452)
  - 10 or/1-9 (28965)
  - 11 limit 10 to yr="2019 -Current" (8995)

### **Appendix B. Version 9 (3 June 2020)**

See "Strategy A. Original NICE search strategy v9 from June 2020" p10 above.

### **Appendix B. Version 10 (16 April 2021)**

See "Final recommended search strategy" p66 below.

## Figure 4. Recommended NICE COVID-19 search strategy for Ovid MEDLINE

- 1 SARS-CoV-2/ or COVID-19/
- 2 (corona\* adj1 (virus\* or viral\*)).ti,ab,kw,kf.
- 3 (CoV not (Coefficient\* or "co-efficen\*" or covalent\* or Covington\* or covariant\* or covarianc\* or "cut-off value\*" or "cutoff value\*" or "cut-off volume\*" or "cutoff volume\*" or "combined optimi?ation value\*" or "central vessel trunk\*" or CoVR or CoVS)).ti,ab,kw,kf.
- 4 (coronavirus\* or 2019nCoV\* or 19nCoV\* or "2019 novel\*" or Ncov\* or "n-cov" or "SARS-CoV-2\*" or "SARSCoV-2\*" or SARSCoV2\* or "SARS-CoV2\*" or "severe acute respiratory syndrome\*" or COVID\*2).ti,ab,kw,kf.
- 5 or/1-4
- 6 limit 5 to yr="2020-Current"
- 7 (6 and english.lg.) not (letter or historical article or comment or editorial or news).pt. not (Animals/ not humans/)

### Note:

- The limits on line 7 are optional.
- The strategy is designed for the NICE remit on COVID-19 and SARS-CoV-2:
- It does not include MeSH headings "exp COVID-19 Testing" or "COVID-19 Vaccines".
- It is not configured for Long Covid, which should be searched separately.
- It does not aim to comprehensively cover other coronaviruses (such as MERS or SARS).
